# Supplementary material for: LINC00174 is a novel prognostic factor in thymic epithelial tumors involved in cell migration and lipid metabolism
Source: PubMed Central journal article supplement (PMC7648846; doi:10.1038/s41419-020-03171-9), 2020-11-07
Supplement: 41419_2020_3171_MOESM13_ESM.pdf [file 41419_2020_3171_MOESM13_ESM.pdf]

lncRNAs deregulated in 6 Tumor versus 3 Normal tissues of patients affected by Thymoma from IRE cohort (See Bellissimo et al, 2017 for the description of the cohort)

| Up-regulated T vs N |                  |          |          |
|---------------------|------------------|----------|----------|
| lncRNA              | permutation test | t-test   | log2fold |
| OTTHUMG00000164547  | 0,02313772       | 0,031191 | 2,713387 |
| OTTHUMG00000172467  | 0,027556809      | 0,034686 | 2,617111 |
| LINC00491           | 0,0084816        | 0,013202 | 2,172396 |
| OTTHUMG00000015101  | 0,033507042      | 0,045558 | 1,686779 |
| OTTHUMG00000020335  | 0,017898947      | 0,017911 | 1,407693 |
| OTTHUMG00000172035  | 0,030045759      | 0,037708 | 1,403797 |
| OTTHUMG00000166987  | 0,013295872      | 0,017352 | 1,369417 |
| LINC00263           | 0,011503806      | 0,012383 | 1,263002 |
| OTTHUMG00000162559  | 0,028245328      | 0,03384  | 1,237226 |
| LINC00669           | 0,022795172      | 0,024541 | 1,106992 |
| OTTHUMG00000164644  | 0,011696436      | 0,011328 | 1,051994 |
| OTTHUMG00000018883  | 0,004114105      | 0,004275 | 1,023734 |
| OTTHUMG00000022365  | 0,025730882      | 0,035119 | 0,893605 |
| OTTHUMG00000013379  | 0,012148774      | 0,012591 | 0,891369 |
| OTTHUMG00000182863  | 0,01976628       | 0,023868 | 0,877445 |
| OTTHUMG00000169048  | 0,011134809      | 0,01489  | 0,857132 |
| OTTHUMG00000154935  | 0,025404008      | 0,033315 | 0,832516 |
| OTTHUMG00000170462  | 0,00890299       | 0,031358 | 0,813676 |
| OTTHUMG00000168228  | 0,045810062      | 0,046167 | 0,804428 |
| LINC00889           | 0,049434204      | 0,049511 | 0,798252 |
| OTTHUMG00000154733  | 0,025144026      | 0,03074  | 0,789618 |
| OTTHUMG00000160994  | 0,033000812      | 0,034643 | 0,739351 |
| OTTHUMG00000021104  | 0,010508185      | 0,010957 | 0,71144  |
| MGC16142            | 0,024991602      | 0,037253 | 0,692336 |
| OTTHUMG00000013230  | 0,020922473      | 0,023696 | 0,689487 |
| LINC00515           | 0,005567852      | 0,004522 | 0,675677 |
| OTTHUMG00000182110  | 0,026072422      | 0,027559 | 0,669527 |
| OTTHUMG00000179318  | 0,013310345      | 0,015859 | 0,628129 |
| OTTHUMG00000165905  | 0,036819823      | 0,041337 | 0,613825 |
| LINC00174           | 0,005759511      | 0,005446 | 0,605546 |
| LINC00630           | 0,0205166        | 0,02086  | 0,51887  |
| OTTHUMG00000017165  | 0,011195295      | 0,012355 | 0,489944 |
| OTTHUMG00000170253  | 0,038748425      | 0,043156 | 0,482376 |
| OTTHUMG00000155365  | 0,005324224      | 0,004559 | 0,475502 |
| OTTHUMG00000041437  | 0,021663386      | 0,02335  | 0,473984 |
| OTTHUMG00000170339  | 0,025944056      | 0,029217 | 0,459455 |
| OTTHUMG00000166985  | 0,032485895      | 0,033413 | 0,420852 |
| OTTHUMG00000167225  | 0,012762165      | 0,027148 | 0,403681 |
| OTTHUMG00000168693  | 0,001297991      | 0,001676 | 0,400133 |
| OTTHUMG00000151447  | 0,018006112      | 0,018105 | 0,395594 |
| OTTHUMG00000151405  | 0,046323474      | 0,046633 | 0,377753 |
| OTTHUMG00000175754  | 0,030040067      | 0,032865 | 0,363258 |
| OTTHUMG00000155315  | 0,030487087      | 0,033869 | 0,357845 |
| OTTHUMG00000163333  | 0,022079719      | 0,023704 | 0,332795 |
| OTTHUMG00000162408  | 0,046199594      | 0,049006 | 0,329568 |
| OTTHUMG00000178589  | 0,022212034      | 0,022726 | 0,329017 |
| OTTHUMG00000151845  | 0,001102662      | 0,002156 | 0,320839 |
| OTTHUMG00000151374  | 0,003622961      | 0,003623 | 0,310256 |
| OTTHUMG00000154724  | 0,020654609      | 0,020639 | 0,307492 |
| LINC00894           | 0,006205996      | 0,005156 | 0,302026 |
| OTTHUMG00000164289  | 0,017892184      | 0,023365 | 0,292332 |
| OTTHUMG00000163069  | 0,049412783      | 0,049657 | 0,290011 |
| LINC00882           | 0,020361496      | 0,02311  | 0,265031 |
| OTTHUMG00000153617  | 0,022928439      | 0,028456 | 0,261646 |
| LINC00449           | 0,012731023      | 0,012323 | 0,260442 |
| OTTHUMG00000152702  | 0,019073999      | 0,019612 | 0,253236 |
| OTTHUMG00000015931  | 0,034222618      | 0,042027 | 0,235699 |
| OTTHUMG00000017561  | 0,045666564      | 0,047925 | 0,23528  |
| OTTHUMG00000154585  | 0,017676519      | 0,021251 | 0,224579 |
| OTTHUMG00000161703  | 0,025411455      | 0,025985 | 0,210037 |
| OTTHUMG00000163132  | 0,027328582      | 0,04429  | 0,188929 |
| OTTHUMG00000168468  | 0,006531837      | 0,005646 | 0,174071 |
| OTTHUMG00000160705  | 0,041188437      | 0,041823 | 0,163973 |
| LINC00391           | 0,049110532      | 0,049507 | 0,163118 |
| OTTHUMG00000159007  | 0,043185309      | 0,045339 | 0,153861 |
| OTTHUMG00000017875  | 0,03106156       | 0,035226 | 0,146985 |
| LINC00489           | 0,028545024      | 0,033118 | 0,107137 |
| OTTHUMG00000161221  | 0,02122568       | 0,022798 | 0,101003 |
| OTTHUMG00000162625  | 0,003520005      | 0,002876 | 0,080823 |
| OTTHUMG00000032884  | 0,037115403      | 0,037975 | 0,051662 |

| Down-regulated T vs N |                  |          |          |
|-----------------------|------------------|----------|----------|
| lncRNA                | permutation test | t-test   | log2fold |
| OTTHUMG00000154833    | 0,001647328      | 0,031859 | -2,93332 |
| LINC00312             | 0,006345716      | 0,030297 | -1,91666 |
| OTTHUMG00000164793    | 0,004328859      | 0,006806 | -1,43703 |
| OTTHUMG00000154838    | 0,023947598      | 0,033988 | -1,42867 |
| OTTHUMG00000012183    | 0,00219664       | 0,001712 | -0,91373 |
| LINC00926             | 0,002635721      | 0,00303  | -0,75968 |
| OTTHUMG00000171168    | 0,003763251      | 0,003222 | -0,74685 |
| OTTHUMG00000171168    | 0,003763251      | 0,003222 | -0,74685 |
| FLI25363              | 0,005987977      | 0,005502 | -0,7283  |
| OTTHUMG00000184009    | 0,007096142      | 0,006544 | -0,72104 |
| OTTHUMG00000162005    | 0,004554282      | 0,003499 | -0,60007 |
| LINC00641             | 0,004771766      | 0,004904 | -0,54932 |
| OTTHUMG00000163048    | 0,018899739      | 0,03108  | -0,52663 |
| OTTHUMG00000017960    | 0,003510357      | 0,032539 | -0,49027 |
| OTTHUMG00000022248    | 0,004440458      | 0,005588 | -0,48554 |
| OTTHUMG00000152374    | 0,046200357      | 0,047689 | -0,48294 |
| OTTHUMG00000015353    | 0,001880106      | 0,002883 | -0,46331 |
| LINC00957             | 0,004951003      | 0,004996 | -0,46291 |
| LINC00310             | 0,003979918      | 0,003933 | -0,45145 |
| OTTHUMG00000165726    | 0,015094641      | 0,046773 | -0,44941 |
| LINC00189             | 0,001193605      | 0,001039 | -0,41506 |
| OTTHUMG00000151365    | 0,005397928      | 0,008206 | -0,41048 |
| OTTHUMG00000163006    | 0,00439967       | 0,004966 | -0,3857  |
| OTTHUMG00000169910    | 0,009968998      | 0,03436  | -0,35978 |
| OTTHUMG00000163345    | 0,002397299      | 0,002177 | -0,35661 |
| OTTHUMG00000034834    | 0,019933404      | 0,024664 | -0,35637 |
| OTTHUMG00000161869    | 0,013375599      | 0,027172 | -0,35624 |
| OTTHUMG00000162000    | 0,025129717      | 0,032229 | -0,35147 |
| OTTHUMG00000163630    | 0,008489053      | 0,019717 | -0,33693 |
| LINC00582             | 0,094923377      | 0,109095 | -0,33369 |
| OTTHUMG00000153047    | 0,01575003       | 0,01512  | -0,29866 |
| LINC00324             | 0,038554356      | 0,042943 | -0,29643 |
| OTTHUMG00000017965    | 0,009221169      | 0,008227 | -0,29173 |
| LINC00269             | 0,007081687      | 0,037883 | -0,291   |
| OTTHUMG00000171842    | 0,022853313      | 0,036461 | -0,28655 |
| OTTHUMG00000151543    | 0,013506434      | 0,044299 | -0,28255 |
| OTTHUMG00000161608    | 0,029742731      | 0,043485 | -0,27378 |
| OTTHUMG00000172383    | 0,008824392      | 0,007781 | -0,2694  |
| OTTHUMG00000008401    | 0,0205941        | 0,034281 | -0,26558 |
| OTTHUMG00000171853    | 0,002490998      | 0,002961 | -0,26273 |
| OTTHUMG00000177663    | 0,003059821      | 0,00227  | -0,254   |
| OTTHUMG00000168051    | 0,022142161      | 0,022848 | -0,24495 |
| OTTHUMG00000151805    | 0,020368027      | 0,049928 | -0,24435 |
| OTTHUMG00000086913    | 0,028530346      | 0,031394 | -0,244   |
| OTTHUMG00000017587    | 0,027338685      | 0,027866 | -0,23812 |
| OTTHUMG00000066367    | 0,024582969      | 0,045783 | -0,23665 |
| OTTHUMG00000078329    | 0,04071423       | 0,044547 | -0,23545 |
| OTTHUMG00000018322    | 0,015503393      | 0,014772 | -0,23323 |
| OTTHUMG00000160728    | 0,021831764      | 0,024504 | -0,23255 |
| LINC00508             | 0,008327852      | 0,007441 | -0,23172 |
| OTTHUMG00000152138    | 0,028447622      | 0,03954  | -0,22635 |
| OTTHUMG00000158359    | 0,00043007       | 0,001314 | -0,22493 |
| LINC00473             | 0,006761314      | 0,005638 | -0,22419 |
| OTTHUMG00000171195    | 0,038944073      | 0,04763  | -0,21283 |
| OTTHUMG00000163675    | 0,015599442      | 0,027199 | -0,21212 |
| OTTHUMG00000150946    | 0,036325637      | 0,040951 | -0,2047  |
| OTTHUMG00000168914    | 0,021285571      | 0,033093 | -0,20251 |
| OTTHUMG00000152023    | 0,038613919      | 0,043996 | -0,20218 |
| OTTHUMG00000163136    | 0,005704639      | 0,006081 | -0,19073 |
| OTTHUMG00000162339    | 0,018372199      | 0,022399 | -0,1865  |
| OTTHUMG00000154343    | 0,003267778      | 0,008982 | -0,18559 |
| OTTHUMG0000014989     | 0,040958721      | 0,046709 | -0,18393 |
| OTTHUMG00000004188    | 0,02250644       | 0,028749 | -0,1818  |
| OTTHUMG00000037511    | 0,038273316      | 0,03913  | -0,1773  |
| OTTHUMG00000037823    | 0,020935398      | 0,025862 | -0,17611 |
| LINC00517             | 0,021033693      | 0,024932 | -0,17509 |
| LINC00568             | 0,004701511      | 0,007222 | -0,17389 |
| OTTHUMG00000168958    | 0,040570755      | 0,041807 | -0,17083 |
| OTTHUMG00000162167    | 0,0234486        | 0,027667 | -0,17047 |
| OTTHUMG00000154465    | 0,031918582      | 0,0341   | -0,16224 |
| LINC00910             | 0,03319576       | 0,040917 | -0,15149 |
| OTTHUMG00000162998    | 0,010006315      | 0,010153 | -0,14859 |
| LINC00173             | 0,455432445      | 0,425941 | -0,14328 |
| OTTHUMG00000168706    | 0,036256723      | 0,037364 | -0,14108 |
| OTTHUMG00000020779    | 0,013122677      | 0,013913 | -0,13945 |
| OTTHUMG00000151627    | 0,012688516      | 0,011837 | -0,13403 |
| OTTHUMG00000151420    | 0,024299527      | 0,030711 | -0,13355 |
| OTTHUMG00000020459    | 0,01793237       | 0,017729 | -0,13191 |
| OTTHUMG00000171690    | 0,007412684      | 0,008215 | -0,12787 |
| OTTHUMG00000168454    | 0,045050588      | 0,046862 | -0,12686 |
| OTTHUMG00000177424    | 0,046534367      | 0,048233 | -0,11062 |
| OTTHUMG00000160932    | 0,007357656      | 0,029884 | -0,10221 |
| OTTHUMG00000170013    | 0,021837501      | 0,037759 | -0,03977 |
| OTTHUMG00000180596    | 0,933444262      | 0,927934 | -0,0075  |
