# Supplementary material for: LINC00174 is a novel prognostic factor in thymic epithelial tumors involved in cell migration and lipid metabolism
Source: PubMed Central journal article supplement (PMC7648846; doi:10.1038/s41419-020-03171-9), 2020-11-07
Supplement: 41419_2020_3171_MOESM15_ESM.pdf [file 41419_2020_3171_MOESM15_ESM.pdf]

List of 393 genes and 12 lncRNAs positively correlated in IRE cohort and validated in TCGA cohort (all of them are predicted to be target of miR145-5p by miRwalk 2.0 tool)

| lncRNAs    | lncRNAs ID | mRNAs     | lncRNA\gene         | R Spearman  | pval        |
|------------|------------|-----------|---------------------|-------------|-------------|
| C17orf102  | 400591     | ELOVL6    | C17orf102\ELOVL6    | 0,187349229 | 0,041323513 |
| C17orf102  | 400591     | SHROOM2   | C17orf102\SHROOM2   | 0,202008834 | 0,027583337 |
| CDKN2B-AS1 | 100048912  | NIF3L1    | CDKN2B-AS1\NIF3L1   | 0,283998006 | 0,001814157 |
| CDKN2B-AS1 | 100048912  | PLCXD1    | CDKN2B-AS1\PLCXD1   | 0,435080473 | 9,94233E-07 |
| CDKN2B-AS1 | 100048912  | RCC2      | CDKN2B-AS1\RCC2     | 0,282502493 | 0,001921413 |
| CDKN2B-AS1 | 100048912  | UNG       | CDKN2B-AS1\UNG      | 0,235507762 | 0,010071077 |
| CDKN2B-AS1 | 100048912  | YY1AP1    | CDKN2B-AS1\YY1AP1   | 0,200263495 | 0,029137406 |
| CTBP1-AS2  | 92070      | ARV1      | CTBP1-AS2\ARV1      | 0,208139866 | 0,023276743 |
| CTBP1-AS2  | 92070      | C15orf41  | CTBP1-AS2\C15orf41  | 0,268793619 | 0,003208359 |
| CTBP1-AS2  | 92070      | COG5      | CTBP1-AS2\COG5      | 0,503774391 | 8,34822E-09 |
| CTBP1-AS2  | 92070      | COG8      | CTBP1-AS2\COG8      | 0,507605754 | 6,13749E-09 |
| CTBP1-AS2  | 92070      | CROT      | CTBP1-AS2\CROT      | 0,482609315 | 4,12875E-08 |
| CTBP1-AS2  | 92070      | GPHN      | CTBP1-AS2\GPHN      | 0,281270474 | 0,002014066 |
| CTBP1-AS2  | 92070      | PLD2      | CTBP1-AS2\PLD2      | 0,287188435 | 0,001603325 |
| CTBP1-AS2  | 92070      | RNF170    | CTBP1-AS2\RNF170    | 0,274163225 | 0,0026324   |
| CTBP1-AS2  | 92070      | SGPP2     | CTBP1-AS2\SGPP2     | 0,340571144 | 0,000164465 |
| CTBP1-AS2  | 92070      | SIX1      | CTBP1-AS2\SIX1      | 0,320217918 | 0,000411053 |
| CTBP1-AS2  | 92070      | SYBU      | CTBP1-AS2\SYBU      | 0,304173195 | 0,000811472 |
| CTBP1-AS2  | 92070      | ZNF132    | CTBP1-AS2\ZNF132    | 0,34575559  | 0,00012897  |
| CTBP1-AS2  | 92070      | GLI2      | CTBP1-AS2\GLI2      | 0,283150548 | 0,001874247 |
| CTBP1-AS2  | 92070      | GRHL2     | CTBP1-AS2\GRHL2     | 0,326731053 | 0,000287119 |
| CTBP1-AS2  | 92070      | GRTP1     | CTBP1-AS2\GRTP1     | 0,307057399 | 0,000720007 |
| CTBP1-AS2  | 92070      | GTF2I     | CTBP1-AS2\GTF2I     | 0,535799744 | 4,29224E-10 |
| CTBP1-AS2  | 92070      | HIST2H2BF | CTBP1-AS2\HIST2H2BF | 0,282174904 | 0,001945663 |
| CTBP1-AS2  | 92070      | MAML3     | CTBP1-AS2\MAML3     | 0,558973081 | 0           |
| CTBP1-AS2  | 92070      | MARVELD2  | CTBP1-AS2\MARVELD2  | 0,386704173 | 1,63357E-05 |
| CTBP1-AS2  | 92070      | RABGAP1   | CTBP1-AS2\RABGAP1   | 0,481840194 | 4,36443E-08 |
| CTBP1-AS2  | 92070      | RTF1      | CTBP1-AS2\RTF1      | 0,46364478  | 1,55625E-07 |
| CTBP1-AS2  | 92070      | TSPAN13   | CTBP1-AS2\TSPAN13   | 0,248219627 | 0,006615131 |
| CTBP1-AS2  | 92070      | UEVLD     | CTBP1-AS2\UEVLD     | 0,484909557 | 3,49387E-08 |
| CTBP1-AS2  | 92070      | ZNF221    | CTBP1-AS2\ZNF221    | 0,361494089 | 6,01325E-05 |
| CTBP1-AS2  | 92070      | ALDH7A1   | CTBP1-AS2\ALDH7A1   | 0,385785501 | 1,7161E-05  |

|           |       |          |                    |             |             |
|-----------|-------|----------|--------------------|-------------|-------------|
| CTBP1-AS2 | 92070 | ALS2     | CTBP1-AS2\ALS2     | 0,45410198  | 2,94432E-07 |
| CTBP1-AS2 | 92070 | ANK3     | CTBP1-AS2\ANK3     | 0,43630537  | 9,21208E-07 |
| CTBP1-AS2 | 92070 | ANKFY1   | CTBP1-AS2\ANKFY1   | 0,507456203 | 6,21247E-09 |
| CTBP1-AS2 | 92070 | ARL6IP1  | CTBP1-AS2\ARL6IP1  | 0,413281584 | 3,6917E-06  |
| CTBP1-AS2 | 92070 | ATP6V1C1 | CTBP1-AS2\ATP6V1C1 | 0,388968808 | 1,4458E-05  |
| CTBP1-AS2 | 92070 | ATRNL1   | CTBP1-AS2\ATRNL1   | 0,307538648 | 0,000668252 |
| CTBP1-AS2 | 92070 | BRD1     | CTBP1-AS2\BRD1     | 0,456188577 | 2,56527E-07 |
| CTBP1-AS2 | 92070 | C1orf109 | CTBP1-AS2\C1orf109 | 0,509136875 | 5,41632E-09 |
| CTBP1-AS2 | 92070 | CAMSAP1  | CTBP1-AS2\CAMSAP1  | 0,446617291 | 4,79257E-07 |
| CTBP1-AS2 | 92070 | CCDC30   | CTBP1-AS2\CCDC30   | 0,287380715 | 0,001591362 |
| CTBP1-AS2 | 92070 | CDH1     | CTBP1-AS2\CDH1     | 0,370922945 | 3,73756E-05 |
| CTBP1-AS2 | 92070 | CDS1     | CTBP1-AS2\CDS1     | 0,358894744 | 6,83881E-05 |
| CTBP1-AS2 | 92070 | CETN3    | CTBP1-AS2\CETN3    | 0,288192565 | 0,001541743 |
| CTBP1-AS2 | 92070 | CLCN5    | CTBP1-AS2\CLCN5    | 0,227218345 | 0,013104923 |
| CTBP1-AS2 | 92070 | CLINT1   | CTBP1-AS2\CLINT1   | 0,529874662 | 8,28399E-10 |
| CTBP1-AS2 | 92070 | CLTC     | CTBP1-AS2\CLTC     | 0,38163367  | 2,14062E-05 |
| CTBP1-AS2 | 92070 | CNTNAP3  | CTBP1-AS2\CNTNAP3  | 0,423258795 | 2,04678E-06 |
| CTBP1-AS2 | 92070 | DCAKD    | CTBP1-AS2\DCAKD    | 0,269619712 | 0,003112931 |
| CTBP1-AS2 | 92070 | DDX31    | CTBP1-AS2\DDX31    | 0,246595927 | 0,006987837 |
| CTBP1-AS2 | 92070 | DHTKD1   | CTBP1-AS2\DHTKD1   | 0,375950719 | 2,88379E-05 |
| CTBP1-AS2 | 92070 | DMRT2    | CTBP1-AS2\DMRT2    | 0,228236718 | 0,012693515 |
| CTBP1-AS2 | 92070 | DNAJC16  | CTBP1-AS2\DNAJC16  | 0,470096852 | 1,00021E-07 |
| CTBP1-AS2 | 92070 | ELOVL6   | CTBP1-AS2\ELOVL6   | 0,408168352 | 4,96089E-06 |
| CTBP1-AS2 | 92070 | EPN3     | CTBP1-AS2\EPN3     | 0,205412334 | 0,025179857 |
| CTBP1-AS2 | 92070 | FAM120A  | CTBP1-AS2\FAM120A  | 0,290101125 | 0,001430602 |
| CTBP1-AS2 | 92070 | FAM154B  | CTBP1-AS2\FAM154B  | 0,479348525 | 3,48268E-08 |
| CTBP1-AS2 | 92070 | FAM160A1 | CTBP1-AS2\FAM160A1 | 0,394046432 | 1,09616E-05 |
| CTBP1-AS2 | 92070 | FAM199X  | CTBP1-AS2\FAM199X  | 0,369199544 | 4,08123E-05 |
| CTBP1-AS2 | 92070 | FBXO22   | CTBP1-AS2\FBXO22   | 0,346339553 | 0,000125455 |
| CTBP1-AS2 | 92070 | FEM1B    | CTBP1-AS2\FEM1B    | 0,498910412 | 1,22218E-08 |
| CTBP1-AS2 | 92070 | FKTN     | CTBP1-AS2\FKTN     | 0,434795613 | 1,01199E-06 |
| CTBP1-AS2 | 92070 | FLVCR1   | CTBP1-AS2\FLVCR1   | 0,25395955  | 0,005435368 |
| CTBP1-AS2 | 92070 | GRIP1    | CTBP1-AS2\GRIP1    | 0,498589944 | 1,25284E-08 |
| CTBP1-AS2 | 92070 | HPSE     | CTBP1-AS2\HPSE     | 0,26078194  | 0,004280183 |

|           |       |          |                    |             |             |
|-----------|-------|----------|--------------------|-------------|-------------|
| CTBP1-AS2 | 92070 | IFT140   | CTBP1-AS2\IFT140   | 0,268850591 | 0,003201694 |
| CTBP1-AS2 | 92070 | IGSF3    | CTBP1-AS2\IGSF3    | 0,292137872 | 0,001320099 |
| CTBP1-AS2 | 92070 | IQCH     | CTBP1-AS2\IQCH     | 0,260041305 | 0,004393924 |
| CTBP1-AS2 | 92070 | ITGA2    | CTBP1-AS2\ITGA2    | 0,461408631 | 1,81011E-07 |
| CTBP1-AS2 | 92070 | KLHDC10  | CTBP1-AS2\KLHDC10  | 0,486611594 | 3,08494E-08 |
| CTBP1-AS2 | 92070 | LARS     | CTBP1-AS2\LARS     | 0,272482552 | 0,00280172  |
| CTBP1-AS2 | 92070 | LMBR1    | CTBP1-AS2\LMBR1    | 0,445947871 | 5,00333E-07 |
| CTBP1-AS2 | 92070 | LRPPRC   | CTBP1-AS2\LRPPRC   | 0,358901866 | 6,83641E-05 |
| CTBP1-AS2 | 92070 | MAP3K2   | CTBP1-AS2\MAP3K2   | 0,494730095 | 1,68362E-08 |
| CTBP1-AS2 | 92070 | MAST4    | CTBP1-AS2\MAST4    | 0,362718986 | 5,65748E-05 |
| CTBP1-AS2 | 92070 | MCTP2    | CTBP1-AS2\MCTP2    | 0,18506623  | 0,044035214 |
| CTBP1-AS2 | 92070 | METTL8   | CTBP1-AS2\METTL8   | 0,310846033 | 0,00061425  |
| CTBP1-AS2 | 92070 | MYO10    | CTBP1-AS2\MYO10    | 0,346275459 | 0,000125836 |
| CTBP1-AS2 | 92070 | NEO1     | CTBP1-AS2\NEO1     | 0,227261074 | 0,01308743  |
| CTBP1-AS2 | 92070 | NETO2    | CTBP1-AS2\NETO2    | 0,233264492 | 0,010823921 |
| CTBP1-AS2 | 92070 | NHLRC3   | CTBP1-AS2\NHLRC3   | 0,475252813 | 6,97809E-08 |
| CTBP1-AS2 | 92070 | NPNT     | CTBP1-AS2\NPNT     | 0,351545364 | 9,78358E-05 |
| CTBP1-AS2 | 92070 | NRCAM    | CTBP1-AS2\NRCAM    | 0,214093434 | 0,019547728 |
| CTBP1-AS2 | 92070 | OSBPL3   | CTBP1-AS2\OSBPL3   | 0,432267483 | 1,18335E-06 |
| CTBP1-AS2 | 92070 | OXCT1    | CTBP1-AS2\OXCT1    | 0,375131748 | 3,00905E-05 |
| CTBP1-AS2 | 92070 | PAX9     | CTBP1-AS2\PAX9     | 0,311964108 | 0,000585892 |
| CTBP1-AS2 | 92070 | PGAP1    | CTBP1-AS2\PGAP1    | 0,364891041 | 5,07464E-05 |
| CTBP1-AS2 | 92070 | PIAS2    | CTBP1-AS2\PIAS2    | 0,531505484 | 6,97586E-10 |
| CTBP1-AS2 | 92070 | PKP4     | CTBP1-AS2\PKP4     | 0,352172055 | 9,49242E-05 |
| CTBP1-AS2 | 92070 | PLA2G12A | CTBP1-AS2\PLA2G12A | 0,419078479 | 2,62621E-06 |
| CTBP1-AS2 | 92070 | PMPCB    | CTBP1-AS2\PMPCB    | 0,278891896 | 0,002204512 |
| CTBP1-AS2 | 92070 | PRRG4    | CTBP1-AS2\PRRG4    | 0,422760291 | 2,10888E-06 |
| CTBP1-AS2 | 92070 | PSD3     | CTBP1-AS2\PSD3     | 0,397272468 | 9,173E-06   |
| CTBP1-AS2 | 92070 | PTPRK    | CTBP1-AS2\PTPRK    | 0,192572283 | 0,036029608 |
| CTBP1-AS2 | 92070 | RAB14    | CTBP1-AS2\RAB14    | 0,364955135 | 5,05833E-05 |
| CTBP1-AS2 | 92070 | RAD50    | CTBP1-AS2\RAD50    | 0,515510611 | 3,17117E-09 |
| CTBP1-AS2 | 92070 | RPGRIP1L | CTBP1-AS2\RPGRIP1L | 0,476434981 | 6,41954E-08 |
| CTBP1-AS2 | 92070 | RPS6KA6  | CTBP1-AS2\RPS6KA6  | 0,364243695 | 4,65524E-05 |
| CTBP1-AS2 | 92070 | SDR42E1  | CTBP1-AS2\SDR42E1  | 0,24842615  | 0,006569017 |

|           |       |          |                    |             |             |
|-----------|-------|----------|--------------------|-------------|-------------|
| CTBP1-AS2 | 92070 | SGPL1    | CTBP1-AS2\SGPL1    | 0,411814556 | 4,02021E-06 |
| CTBP1-AS2 | 92070 | SIX4     | CTBP1-AS2\SIX4     | 0,307164222 | 0,000716809 |
| CTBP1-AS2 | 92070 | SLC22A23 | CTBP1-AS2\SLC22A23 | 0,231135166 | 0,011583894 |
| CTBP1-AS2 | 92070 | SLC30A6  | CTBP1-AS2\SLC30A6  | 0,49427432  | 1,74281E-08 |
| CTBP1-AS2 | 92070 | SLC46A1  | CTBP1-AS2\SLC46A1  | 0,255846745 | 0,005090774 |
| CTBP1-AS2 | 92070 | SNX1     | CTBP1-AS2\SNX1     | 0,442679106 | 6,16578E-07 |
| CTBP1-AS2 | 92070 | SORBS2   | CTBP1-AS2\SORBS2   | 0,353838485 | 8,75711E-05 |
| CTBP1-AS2 | 92070 | SORCS2   | CTBP1-AS2\SORCS2   | 0,266635807 | 0,003470194 |
| CTBP1-AS2 | 92070 | SPATA6   | CTBP1-AS2\SPATA6   | 0,48234582  | 4,2081E-08  |
| CTBP1-AS2 | 92070 | SPIN1    | CTBP1-AS2\SPIN1    | 0,496190001 | 1,50651E-08 |
| CTBP1-AS2 | 92070 | STEAP2   | CTBP1-AS2\STEAP2   | 0,430878792 | 1,28889E-06 |
| CTBP1-AS2 | 92070 | STX6     | CTBP1-AS2\STX6     | 0,218145563 | 0,017315707 |
| CTBP1-AS2 | 92070 | SYT1     | CTBP1-AS2\SYT1     | 0,225053411 | 0,014018494 |
| CTBP1-AS2 | 92070 | TNPO1    | CTBP1-AS2\TNPO1    | 0,445392394 | 5,1849E-07  |
| CTBP1-AS2 | 92070 | TP63     | CTBP1-AS2\TP63     | 0,439317761 | 7,62714E-07 |
| CTBP1-AS2 | 92070 | TRMT5    | CTBP1-AS2\TRMT5    | 0,23425438  | 0,010485815 |
| CTBP1-AS2 | 92070 | TRPM7    | CTBP1-AS2\TRPM7    | 0,504052129 | 8,16601E-09 |
| CTBP1-AS2 | 92070 | TRUB1    | CTBP1-AS2\TRUB1    | 0,560197977 | 0           |
| CTBP1-AS2 | 92070 | TTC22    | CTBP1-AS2\TTC22    | 0,496184592 | 9,55532E-09 |
| CTBP1-AS2 | 92070 | UBAP2    | CTBP1-AS2\UBAP2    | 0,505269905 | 7,40979E-09 |
| CTBP1-AS2 | 92070 | UBFD1    | CTBP1-AS2\UBFD1    | 0,516707022 | 2,8591E-09  |
| CTBP1-AS2 | 92070 | UNC5B    | CTBP1-AS2\UNC5B    | 0,404393961 | 6,1522E-06  |
| CTBP1-AS2 | 92070 | UPF1     | CTBP1-AS2\UPF1     | 0,357662726 | 7,26612E-05 |
| CTBP1-AS2 | 92070 | USP40    | CTBP1-AS2\USP40    | 0,311358781 | 0,000601092 |
| CTBP1-AS2 | 92070 | VMA21    | CTBP1-AS2\VMA21    | 0,231690642 | 0,011381252 |
| CTBP1-AS2 | 92070 | WDR91    | CTBP1-AS2\WDR91    | 0,26574562  | 0,003583709 |
| CTBP1-AS2 | 92070 | XPR1     | CTBP1-AS2\XPR1     | 0,403176186 | 6,59115E-06 |
| CTBP1-AS2 | 92070 | ZBTB41   | CTBP1-AS2\ZBTB41   | 0,510176613 | 4,9719E-09  |
| CTBP1-AS2 | 92070 | ZMYM3    | CTBP1-AS2\ZMYM3    | 0,374440963 | 3,11866E-05 |
| CTBP1-AS2 | 92070 | ZNF257   | CTBP1-AS2\ZNF257   | 0,318010255 | 0,000452355 |
| CTBP1-AS2 | 92070 | ZNF280B  | CTBP1-AS2\ZNF280B  | 0,488990172 | 2,58878E-08 |
| CTBP1-AS2 | 92070 | ZNF449   | CTBP1-AS2\ZNF449   | 0,394295684 | 1,08124E-05 |
| CTBP1-AS2 | 92070 | ZNF543   | CTBP1-AS2\ZNF543   | 0,487921948 | 2,80145E-08 |
| CTBP1-AS2 | 92070 | ZNF562   | CTBP1-AS2\ZNF562   | 0,506081755 | 6,94228E-09 |

|           |           |          |                    |             |             |
|-----------|-----------|----------|--------------------|-------------|-------------|
| CTBP1-AS2 | 92070     | ZNF626   | CTBP1-AS2\ZNF626   | 0,374604757 | 3,09233E-05 |
| CTBP1-AS2 | 92070     | ZRANB3   | CTBP1-AS2\ZRANB3   | 0,526627261 | 1,14877E-09 |
| CTBP1-AS2 | 92070     | AUTS2    | CTBP1-AS2\AUTS2    | 0,390357499 | 1,34094E-05 |
| CTBP1-AS2 | 92070     | BBS4     | CTBP1-AS2\BBS4     | 0,388484546 | 1,48416E-05 |
| CTBP1-AS2 | 92070     | CDC42BPG | CTBP1-AS2\CDC42BPG | 0,459806295 | 2,01581E-07 |
| CTBP1-AS2 | 92070     | CLDN12   | CTBP1-AS2\CLDN12   | 0,393519442 | 1,12834E-05 |
| CTBP1-AS2 | 92070     | DET1     | CTBP1-AS2\DET1     | 0,337993163 | 0,000185321 |
| CTBP1-AS2 | 92070     | ESRP1    | CTBP1-AS2\ESRP1    | 0,199772112 | 0,029541397 |
| CTBP1-AS2 | 92070     | EYA2     | CTBP1-AS2\EYA2     | 0,190969947 | 0,037626746 |
| CTBP1-AS2 | 92070     | FBXW11   | CTBP1-AS2\FBXW11   | 0,463473864 | 1,57439E-07 |
| CTBP1-AS2 | 92070     | GTF3C4   | CTBP1-AS2\GTF3C4   | 0,478172625 | 5,67517E-08 |
| CTBP1-AS2 | 92070     | HPS5     | CTBP1-AS2\HPS5     | 0,456480558 | 2,5161E-07  |
| CTBP1-AS2 | 92070     | KDM4D    | CTBP1-AS2\KDM4D    | 0,370588235 | 3,8021E-05  |
| CTBP1-AS2 | 92070     | LAMP2    | CTBP1-AS2\LAMP2    | 0,364841191 | 5,08736E-05 |
| CTBP1-AS2 | 92070     | LIMK1    | CTBP1-AS2\LIMK1    | 0,264421023 | 0,003758814 |
| CTBP1-AS2 | 92070     | LRIG3    | CTBP1-AS2\LRIG3    | 0,443220339 | 5,95699E-07 |
| CTBP1-AS2 | 92070     | MCOLN3   | CTBP1-AS2\MCOLN3   | 0,26078194  | 0,004280183 |
| CTBP1-AS2 | 92070     | MPP5     | CTBP1-AS2\MPP5     | 0,355953568 | 7,90043E-05 |
| CTBP1-AS2 | 92070     | N4BP1    | CTBP1-AS2\N4BP1    | 0,349259365 | 0,000109179 |
| CTBP1-AS2 | 92070     | NUDT12   | CTBP1-AS2\NUDT12   | 0,267732517 | 0,003334803 |
| CTBP1-AS2 | 92070     | PABPC4L  | CTBP1-AS2\PABPC4L  | 0,383150548 | 1,97519E-05 |
| CTBP1-AS2 | 92070     | PANK1    | CTBP1-AS2\PANK1    | 0,375829654 | 2,90199E-05 |
| CTBP1-AS2 | 92070     | PRRC1    | CTBP1-AS2\PRRC1    | 0,461472725 | 1,80232E-07 |
| CTBP1-AS2 | 92070     | PSMD12   | CTBP1-AS2\PSMD12   | 0,202086597 | 0,027679414 |
| CTBP1-AS2 | 92070     | RAB23    | CTBP1-AS2\RAB23    | 0,398575701 | 8,53186E-06 |
| CTBP1-AS2 | 92070     | RANBP17  | CTBP1-AS2\RANBP17  | 0,238990172 | 0,008993701 |
| CTBP1-AS2 | 92070     | RRAGB    | CTBP1-AS2\RRAGB    | 0,458552913 | 2,19205E-07 |
| CTBP1-AS2 | 92070     | SLC22A5  | CTBP1-AS2\SLC22A5  | 0,32337986  | 0,000357942 |
| CTBP1-AS2 | 92070     | SLC30A1  | CTBP1-AS2\SLC30A1  | 0,331042587 | 0,000254446 |
| CTBP1-AS2 | 92070     | TM7SF3   | CTBP1-AS2\TM7SF3   | 0,331612306 | 0,000247986 |
| CTBP1-AS2 | 92070     | WASL     | CTBP1-AS2\WASL     | 0,408118502 | 4,97509E-06 |
| FAM66E    | 100132103 | ALDH7A1  | FAM66E\ALDH7A1     | 0,351158635 | 9,01382E-05 |
| FAM66E    | 100132103 | ALS2     | FAM66E\ALS2        | 0,531082847 | 5,18152E-10 |
| FAM66E    | 100132103 | ANK3     | FAM66E\ANK3        | 0,570226184 | 1,29397E-11 |

|        |           |          |                 |             |             |
|--------|-----------|----------|-----------------|-------------|-------------|
| FAM66E | 100132103 | AP2B1    | FAM66E\AP2B1    | 0,479863374 | 3,35106E-08 |
| FAM66E | 100132103 | ATP6AP2  | FAM66E\ATP6AP2  | 0,397333945 | 7,6671E-06  |
| FAM66E | 100132103 | AUTS2    | FAM66E\AUTS2    | 0,404365917 | 5,09361E-06 |
| FAM66E | 100132103 | BBS4     | FAM66E\BBS4     | 0,300497005 | 0,000898485 |
| FAM66E | 100132103 | BRD1     | FAM66E\BRD1     | 0,273351234 | 0,002630244 |
| FAM66E | 100132103 | BTBD3    | FAM66E\BTBD3    | 0,488207457 | 1,77888E-08 |
| FAM66E | 100132103 | C15orf41 | FAM66E\C15orf41 | 0,251084631 | 0,005880565 |
| FAM66E | 100132103 | CCDC122  | FAM66E\CCDC122  | 0,551825202 | 7,78254E-11 |
| FAM66E | 100132103 | CCDC148  | FAM66E\CCDC148  | 0,475727535 | 4,55838E-08 |
| FAM66E | 100132103 | CCDC30   | FAM66E\CCDC30   | 0,37421879  | 2,75854E-05 |
| FAM66E | 100132103 | CCDC8    | FAM66E\CCDC8    | 0,301840544 | 0,000849621 |
| FAM66E | 100132103 | CDH1     | FAM66E\CDH1     | 0,544950368 | 1,47995E-10 |
| FAM66E | 100132103 | CDKL3    | FAM66E\CDKL3    | 0,276116882 | 0,002368869 |
| FAM66E | 100132103 | CDS1     | FAM66E\CDS1     | 0,502569966 | 5,74337E-09 |
| FAM66E | 100132103 | CETN3    | FAM66E\CETN3    | 0,308047536 | 0,00065392  |
| FAM66E | 100132103 | CLDN12   | FAM66E\CLDN12   | 0,575003211 | 7,9739E-12  |
| FAM66E | 100132103 | CLTC     | FAM66E\CLTC     | 0,516712481 | 1,79073E-09 |
| FAM66E | 100132103 | CNTNAP3  | FAM66E\CNTNAP3  | 0,502640679 | 5,71074E-09 |
| FAM66E | 100132103 | COG5     | FAM66E\COG5     | 0,57451608  | 8,38043E-12 |
| FAM66E | 100132103 | DDX31    | FAM66E\DDX31    | 0,398976048 | 6,97457E-06 |
| FAM66E | 100132103 | DET1     | FAM66E\DET1     | 0,222414611 | 0,015049699 |
| FAM66E | 100132103 | DHTKD1   | FAM66E\DHTKD1   | 0,209521352 | 0,022199998 |
| FAM66E | 100132103 | DHX32    | FAM66E\DHX32    | 0,325419258 | 0,000304733 |
| FAM66E | 100132103 | DMRTA1   | FAM66E\DMRTA1   | 0,41715215  | 2,36365E-06 |
| FAM66E | 100132103 | DNAJC16  | FAM66E\DNAJC16  | 0,525850117 | 8,19381E-10 |
| FAM66E | 100132103 | DUOX1    | FAM66E\DUOX1    | 0,327430638 | 0,000278115 |
| FAM66E | 100132103 | DUOXA1   | FAM66E\DUOXA1   | 0,325794336 | 0,000299597 |
| FAM66E | 100132103 | EDA2R    | FAM66E\EDA2R    | 0,403800217 | 5,26578E-06 |
| FAM66E | 100132103 | EIF2AK4  | FAM66E\EIF2AK4  | 0,409802928 | 3,68904E-06 |
| FAM66E | 100132103 | ENPEP    | FAM66E\ENPEP    | 0,414650668 | 2,7536E-06  |
| FAM66E | 100132103 | EPN3     | FAM66E\EPN3     | 0,330007719 | 0,000247153 |
| FAM66E | 100132103 | EPS15L1  | FAM66E\EPS15L1  | 0,195920967 | 0,032726138 |
| FAM66E | 100132103 | ESRP1    | FAM66E\ESRP1    | 0,461627387 | 1,26284E-07 |
| FAM66E | 100132103 | FAM154B  | FAM66E\FAM154B  | 0,404508062 | 5,05119E-06 |

|        |           |           |                  |             |             |
|--------|-----------|-----------|------------------|-------------|-------------|
| FAM66E | 100132103 | FAM160A1  | FAM66E\FAM160A1  | 0,559910006 | 3,58626E-11 |
| FAM66E | 100132103 | FAM199X   | FAM66E\FAM199X   | 0,612567301 | 1,32789E-13 |
| FAM66E | 100132103 | FEM1B     | FAM66E\FEM1B     | 0,402016688 | 5,84533E-06 |
| FAM66E | 100132103 | FKTN      | FAM66E\FKTN      | 0,667668109 | 1,10486E-16 |
| FAM66E | 100132103 | FNBP1L    | FAM66E\FNBP1L    | 0,492937343 | 1,23295E-08 |
| FAM66E | 100132103 | FOXE1     | FAM66E\FOXE1     | 0,301709124 | 0,000854291 |
| FAM66E | 100132103 | GLI2      | FAM66E\GLI2      | 0,466655836 | 8,82691E-08 |
| FAM66E | 100132103 | GNPDA1    | FAM66E\GNPDA1    | 0,393782602 | 9,39297E-06 |
| FAM66E | 100132103 | GRHL2     | FAM66E\GRHL2     | 0,436025768 | 7,17287E-07 |
| FAM66E | 100132103 | GRIP1     | FAM66E\GRIP1     | 0,423914015 | 1,55463E-06 |
| FAM66E | 100132103 | G RTP1    | FAM66E\G RTP1    | 0,353217156 | 8,13931E-05 |
| FAM66E | 100132103 | GTF3C4    | FAM66E\GTF3C4    | 0,50276639  | 5,65319E-09 |
| FAM66E | 100132103 | HIST2H2BF | FAM66E\HIST2H2BF | 0,477671284 | 3,94665E-08 |
| FAM66E | 100132103 | HOMER2    | FAM66E\HOMER2    | 0,370227459 | 3,40809E-05 |
| FAM66E | 100132103 | HPSE      | FAM66E\HPSE      | 0,474363507 | 5,04077E-08 |
| FAM66E | 100132103 | IFI44     | FAM66E\IFI44     | 0,237099255 | 0,009423975 |
| FAM66E | 100132103 | IGSF3     | FAM66E\IGSF3     | 0,459623864 | 1,45422E-07 |
| FAM66E | 100132103 | IQCH      | FAM66E\IQCH      | 0,28259101  | 0,001846379 |
| FAM66E | 100132103 | IRF2BP2   | FAM66E\IRF2BP2   | 0,539269791 | 2,48981E-10 |
| FAM66E | 100132103 | ITGA2     | FAM66E\ITGA2     | 0,561017836 | 3,21979E-11 |
| FAM66E | 100132103 | KDM4D     | FAM66E\KDM4D     | 0,573353251 | 9,43352E-12 |
| FAM66E | 100132103 | KLHDC10   | FAM66E\KLHDC10   | 0,590646404 | 1,54472E-12 |
| FAM66E | 100132103 | LARS      | FAM66E\LARS      | 0,270970578 | 0,002875775 |
| FAM66E | 100132103 | LEPREL1   | FAM66E\LEPREL1   | 0,181393462 | 0,048348429 |
| FAM66E | 100132103 | LIMK1     | FAM66E\LIMK1     | 0,394662581 | 8,93407E-06 |
| FAM66E | 100132103 | LRIG3     | FAM66E\LRIG3     | 0,567224828 | 1,74706E-11 |
| FAM66E | 100132103 | LRPPRC    | FAM66E\LRPPRC    | 0,428062486 | 1,19682E-06 |
| FAM66E | 100132103 | MAML3     | FAM66E\MAML3     | 0,568749077 | 1,50057E-11 |
| FAM66E | 100132103 | MAP3K2    | FAM66E\MAP3K2    | 0,615325092 | 9,62083E-14 |
| FAM66E | 100132103 | MARVELD2  | FAM66E\MARVELD2  | 0,544478951 | 1,54581E-10 |
| FAM66E | 100132103 | MCOLN3    | FAM66E\MCOLN3    | 0,450525513 | 2,72925E-07 |
| FAM66E | 100132103 | MCTP2     | FAM66E\MCTP2     | 0,251108202 | 0,005875765 |
| FAM66E | 100132103 | MPP5      | FAM66E\MPP5      | 0,508423396 | 3,56844E-09 |
| FAM66E | 100132103 | MYO10     | FAM66E\MYO10     | 0,469806474 | 7,03191E-08 |

|        |           |          |                 |             |             |
|--------|-----------|----------|-----------------|-------------|-------------|
| FAM66E | 100132103 | N4BP1    | FAM66E\N4BP1    | 0,486895346 | 1,96736E-08 |
| FAM66E | 100132103 | NEO1     | FAM66E\NEO1     | 0,488600305 | 1,7259E-08  |
| FAM66E | 100132103 | NETO2    | FAM66E\NETO2    | 0,269304904 | 0,003059648 |
| FAM66E | 100132103 | NHLRC3   | FAM66E\NHLRC3   | 0,590701402 | 1,5356E-12  |
| FAM66E | 100132103 | NPNT     | FAM66E\NPNT     | 0,306279722 | 0,000704954 |
| FAM66E | 100132103 | NRCAM    | FAM66E\NRCAM    | 0,290055115 | 0,001375181 |
| FAM66E | 100132103 | NUDT12   | FAM66E\NUDT12   | 0,458076044 | 1,62071E-07 |
| FAM66E | 100132103 | PABPC4L  | FAM66E\PABPC4L  | 0,601426143 | 4,73081E-13 |
| FAM66E | 100132103 | PANK1    | FAM66E\PANK1    | 0,423859016 | 1,55999E-06 |
| FAM66E | 100132103 | PAX1     | FAM66E\PAX1     | 0,28413883  | 0,001738075 |
| FAM66E | 100132103 | PAX9     | FAM66E\PAX9     | 0,607342428 | 2,42441E-13 |
| FAM66E | 100132103 | PDGFA    | FAM66E\PDGFA    | 0,196777375 | 0,031957009 |
| FAM66E | 100132103 | PGAP1    | FAM66E\PGAP1    | 0,555840104 | 5,31073E-11 |
| FAM66E | 100132103 | PKP4     | FAM66E\PKP4     | 0,461093114 | 1,31138E-07 |
| FAM66E | 100132103 | PLA2G12A | FAM66E\PLA2G12A | 0,510301208 | 3,05732E-09 |
| FAM66E | 100132103 | PLD2     | FAM66E\PLD2     | 0,397443942 | 7,61876E-06 |
| FAM66E | 100132103 | POMT2    | FAM66E\POMT2    | 0,2794718   | 0,002083434 |
| FAM66E | 100132103 | PRKAR1A  | FAM66E\PRKAR1A  | 0,584297986 | 3,0389E-12  |
| FAM66E | 100132103 | PRRC1    | FAM66E\PRRC1    | 0,49278806  | 1,24741E-08 |
| FAM66E | 100132103 | PSD3     | FAM66E\PSD3     | 0,525229417 | 8,6471E-10  |
| FAM66E | 100132103 | RAB14    | FAM66E\RAB14    | 0,496905104 | 9,02662E-09 |
| FAM66E | 100132103 | RAB23    | FAM66E\RAB23    | 0,536794851 | 3,11377E-10 |
| FAM66E | 100132103 | RABGAP1  | FAM66E\RABGAP1  | 0,58101378  | 4,28806E-12 |
| FAM66E | 100132103 | RAD50    | FAM66E\RAD50    | 0,581862331 | 3,92448E-12 |
| FAM66E | 100132103 | RANBP17  | FAM66E\RANBP17  | 0,445795628 | 3,75902E-07 |
| FAM66E | 100132103 | RNF170   | FAM66E\RNF170   | 0,567319112 | 1,73074E-11 |
| FAM66E | 100132103 | RPGRIP1L | FAM66E\RPGRIP1L | 0,505233473 | 4,63019E-09 |
| FAM66E | 100132103 | RPS6KA6  | FAM66E\RPS6KA6  | 0,59233971  | 1,28642E-12 |
| FAM66E | 100132103 | RRM2B    | FAM66E\RRM2B    | 0,506270591 | 4,25548E-09 |
| FAM66E | 100132103 | RTF1     | FAM66E\RTF1     | 0,274066217 | 0,00256029  |
| FAM66E | 100132103 | SDR42E1  | FAM66E\SDR42E1  | 0,351158635 | 9,01382E-05 |
| FAM66E | 100132103 | SGPL1    | FAM66E\SGPL1    | 0,579528816 | 5,00417E-12 |
| FAM66E | 100132103 | SIX1     | FAM66E\SIX1     | 0,530603573 | 5,4054E-10  |
| FAM66E | 100132103 | SIX4     | FAM66E\SIX4     | 0,48874173  | 1,7072E-08  |



|         |           |          |                 |             |             |
|---------|-----------|----------|-----------------|-------------|-------------|
| FAM66E  | 100132103 | SLC22A5  | FAM66E\SLC22A5  | 0,449472681 | 2,93205E-07 |
| FAM66E  | 100132103 | SLC30A1  | FAM66E\SLC30A1  | 0,509106951 | 3,37354E-09 |
| FAM66E  | 100132103 | SLC46A1  | FAM66E\SLC46A1  | 0,285348801 | 0,001657462 |
| FAM66E  | 100132103 | SMO      | FAM66E\SMO      | 0,303922636 | 0,000778684 |
| FAM66E  | 100132103 | SORBS2   | FAM66E\SORBS2   | 0,427206078 | 1,26358E-06 |
| FAM66E  | 100132103 | SORCS2   | FAM66E\SORCS2   | 0,314584521 | 0,000493263 |
| FAM66E  | 100132103 | SPATA6   | FAM66E\SPATA6   | 0,60749171  | 2,38344E-13 |
| FAM66E  | 100132103 | SPIN1    | FAM66E\SPIN1    | 0,456088235 | 1,86132E-07 |
| FAM66E  | 100132103 | SPINT1   | FAM66E\SPINT1   | 0,310412479 | 0,000590947 |
| FAM66E  | 100132103 | STARD7   | FAM66E\STARD7   | 0,280681771 | 0,001988388 |
| FAM66E  | 100132103 | STEAP2   | FAM66E\STEAP2   | 0,542467571 | 1,85998E-10 |
| FAM66E  | 100132103 | SYBU     | FAM66E\SYBU     | 0,352258608 | 8,53618E-05 |
| FAM66E  | 100132103 | SYT1     | FAM66E\SYT1     | 0,278764675 | 0,002140867 |
| FAM66E  | 100132103 | TMEM185A | FAM66E\TMEM185A | 0,187066182 | 0,041636896 |
| FAM66E  | 100132103 | TMEM30B  | FAM66E\TMEM30B  | 0,480256221 | 3,25385E-08 |
| FAM66E  | 100132103 | TP63     | FAM66E\TP63     | 0,504848483 | 4,7772E-09  |
| FAM66E  | 100132103 | TRMT5    | FAM66E\TRMT5    | 0,44421638  | 4,1786E-07  |
| FAM66E  | 100132103 | TRPM7    | FAM66E\TRPM7    | 0,523681598 | 9,88505E-10 |
| FAM66E  | 100132103 | TSPAN13  | FAM66E\TSPAN13  | 0,306531145 | 0,000697479 |
| FAM66E  | 100132103 | TTC22    | FAM66E\TTC22    | 0,557515704 | 4,52098E-11 |
| FAM66E  | 100132103 | UBTD2    | FAM66E\UBTD2    | 0,429162459 | 1,11597E-06 |
| FAM66E  | 100132103 | UEVLD    | FAM66E\UEVLD    | 0,563995621 | 2,40509E-11 |
| FAM66E  | 100132103 | UNC5B    | FAM66E\UNC5B    | 0,503999932 | 5,1172E-09  |
| FAM66E  | 100132103 | USP46    | FAM66E\USP46    | 0,509342659 | 3,30874E-09 |
| FAM66E  | 100132103 | WASL     | FAM66E\WASL     | 0,562494943 | 2,78701E-11 |
| FAM66E  | 100132103 | WDR91    | FAM66E\WDR91    | 0,277971122 | 0,002207022 |
| FAM66E  | 100132103 | XPR1     | FAM66E\XPR1     | 0,523123754 | 1,03717E-09 |
| FAM66E  | 100132103 | ZBTB41   | FAM66E\ZBTB41   | 0,579670241 | 4,93127E-12 |
| FAM66E  | 100132103 | ZNF280B  | FAM66E\ZNF280B  | 0,618326447 | 6,75063E-14 |
| FAM66E  | 100132103 | ZNF449   | FAM66E\ZNF449   | 0,532992086 | 4,37511E-10 |
| FAM66E  | 100132103 | ZNF626   | FAM66E\ZNF626   | 0,539206936 | 2,50404E-10 |
| FAM95B1 | 100133036 | AP1S1    | FAM95B1\AP1S1   | 0,252200541 | 0,005775171 |
| FAM95B1 | 100133036 | ARV1     | FAM95B1\ARV1    | 0,24918815  | 0,006401337 |
| FAM95B1 | 100133036 | ATP6AP2  | FAM95B1\ATP6AP2 | 0,394430993 | 1,07323E-05 |

|         |           |          |                  |             |             |
|---------|-----------|----------|------------------|-------------|-------------|
| FAM95B1 | 100133036 | C15orf41 | FAM95B1\C15orf41 | 0,326577411 | 0,000310752 |
| FAM95B1 | 100133036 | DMRTA1   | FAM95B1\DMRTA1   | 0,244304546 | 0,007414769 |
| FAM95B1 | 100133036 | DUOX1    | FAM95B1\DUOX1    | 0,363367042 | 5,47732E-05 |
| FAM95B1 | 100133036 | EPS15L1  | FAM95B1\EPS15L1  | 0,237323743 | 0,00949584  |
| FAM95B1 | 100133036 | ESRP1    | FAM95B1\ESRP1    | 0,342643498 | 0,000149306 |
| FAM95B1 | 100133036 | EYA2     | FAM95B1\EYA2     | 0,231697764 | 0,011378675 |
| FAM95B1 | 100133036 | GPHN     | FAM95B1\GPHN     | 0,259621137 | 0,004459649 |
| FAM95B1 | 100133036 | KRTAP5-8 | FAM95B1\KRTAP5-8 | 0,265940249 | 0,003463688 |
| FAM95B1 | 100133036 | LAMP2    | FAM95B1\LAMP2    | 0,200940037 | 0,028588894 |
| FAM95B1 | 100133036 | LIMK1    | FAM95B1\LIMK1    | 0,481576698 | 4,44807E-08 |
| FAM95B1 | 100133036 | MCOLN3   | FAM95B1\MCOLN3   | 0,342622134 | 0,000149456 |
| FAM95B1 | 100133036 | MFSD3    | FAM95B1\MFSD3    | 0,256266914 | 0,005016767 |
| FAM95B1 | 100133036 | NAGK     | FAM95B1\NAGK     | 0,364762854 | 5,10741E-05 |
| FAM95B1 | 100133036 | NUDT12   | FAM95B1\NUDT12   | 0,244430993 | 0,007513775 |
| FAM95B1 | 100133036 | PABPC4L  | FAM95B1\PABPC4L  | 0,258802165 | 0,004590297 |
| FAM95B1 | 100133036 | PLD2     | FAM95B1\PLD2     | 0,353453924 | 8,92191E-05 |
| FAM95B1 | 100133036 | PLEK2    | FAM95B1\PLEK2    | 0,20300527  | 0,026968636 |
| FAM95B1 | 100133036 | RFESD    | FAM95B1\RFESD    | 0,283378436 | 0,001857913 |
| FAM95B1 | 100133036 | RNF170   | FAM95B1\RNF170   | 0,231270474 | 0,011534243 |
| FAM95B1 | 100133036 | SGPP2    | FAM95B1\SGPP2    | 0,24957271  | 0,00631817  |
| FAM95B1 | 100133036 | SLC22A5  | FAM95B1\SLC22A5  | 0,220338983 | 0,016202472 |
| FAM95B1 | 100133036 | SLC44A3  | FAM95B1\SLC44A3  | 0,357669848 | 7,26358E-05 |
| FAM95B1 | 100133036 | SPINT1   | FAM95B1\SPINT1   | 0,268786498 | 0,003209193 |
| FAM95B1 | 100133036 | SYBU     | FAM95B1\SYBU     | 0,209521436 | 0,022360867 |
| FAM95B1 | 100133036 | TMEM129  | FAM95B1\TMEM129  | 0,358025922 | 7,13762E-05 |
| FAM95B1 | 100133036 | UBAC1    | FAM95B1\UBAC1    | 0,351751887 | 9,68672E-05 |
| FAM95B1 | 100133036 | VAC14    | FAM95B1\VAC14    | 0,244188862 | 0,007574728 |
| FAM95B1 | 100133036 | WNK2     | FAM95B1\WNK2     | 0,349779234 | 0,000106496 |
| FAM95B1 | 100133036 | ACAD10   | FAM95B1\ACAD10   | 0,344473722 | 0,000137012 |
| FAM95B1 | 100133036 | ANK3     | FAM95B1\ANK3     | 0,235187295 | 0,010175718 |
| FAM95B1 | 100133036 | ANKFY1   | FAM95B1\ANKFY1   | 0,210126763 | 0,021969459 |
| FAM95B1 | 100133036 | AP2B1    | FAM95B1\AP2B1    | 0,250968523 | 0,006024334 |
| FAM95B1 | 100133036 | APTX     | FAM95B1\APTX     | 0,37900584  | 2,45848E-05 |
| FAM95B1 | 100133036 | ATP2C1   | FAM95B1\ATP2C1   | 0,33034468  | 0,000262572 |

|         |           |           |                   |             |             |
|---------|-----------|-----------|-------------------|-------------|-------------|
| FAM95B1 | 100133036 | ATP6V0B   | FAM95B1\ATP6V0B   | 0,253738784 | 0,005477012 |
| FAM95B1 | 100133036 | C19orf54  | FAM95B1\C19orf54  | 0,31207093  | 0,000583247 |
| FAM95B1 | 100133036 | CAMSAP1   | FAM95B1\CAMSAP1   | 0,287480416 | 0,001585191 |
| FAM95B1 | 100133036 | CBLN3     | FAM95B1\CBLN3     | 0,229105541 | 0,012351515 |
| FAM95B1 | 100133036 | CCDC30    | FAM95B1\CCDC30    | 0,18258795  | 0,046985024 |
| FAM95B1 | 100133036 | CDH1      | FAM95B1\CDH1      | 0,241561031 | 0,008265025 |
| FAM95B1 | 100133036 | CDKL3     | FAM95B1\CDKL3     | 0,327268195 | 0,000301346 |
| FAM95B1 | 100133036 | CDS1      | FAM95B1\CDS1      | 0,331498362 | 0,000249265 |
| FAM95B1 | 100133036 | CNTNAP3   | FAM95B1\CNTNAP3   | 0,233143427 | 0,010865924 |
| FAM95B1 | 100133036 | DDX31     | FAM95B1\DDX31     | 0,281014101 | 0,002033849 |
| FAM95B1 | 100133036 | DENND1A   | FAM95B1\DENND1A   | 0,459642501 | 2,03804E-07 |
| FAM95B1 | 100133036 | DNAJC16   | FAM95B1\DNAJC16   | 0,198931776 | 0,030243336 |
| FAM95B1 | 100133036 | ELOVL6    | FAM95B1\ELOVL6    | 0,322112235 | 0,000378421 |
| FAM95B1 | 100133036 | FAHD1     | FAM95B1\FAHD1     | 0,357093007 | 7,47206E-05 |
| FAM95B1 | 100133036 | FAM120A   | FAM95B1\FAM120A   | 0,488413331 | 2,70165E-08 |
| FAM95B1 | 100133036 | FAM154B   | FAM95B1\FAM154B   | 0,303333399 | 0,000798188 |
| FAM95B1 | 100133036 | FAM199X   | FAM95B1\FAM199X   | 0,330052699 | 0,000266042 |
| FAM95B1 | 100133036 | FKTN      | FAM95B1\FKTN      | 0,263082182 | 0,003943586 |
| FAM95B1 | 100133036 | FLVCR1    | FAM95B1\FLVCR1    | 0,410945734 | 4,22763E-06 |
| FAM95B1 | 100133036 | FSTL4     | FAM95B1\FSTL4     | 0,366415041 | 4,69984E-05 |
| FAM95B1 | 100133036 | GGA2      | FAM95B1\GGA2      | 0,399558467 | 8,07665E-06 |
| FAM95B1 | 100133036 | GGCT      | FAM95B1\GGCT      | 0,312256089 | 0,000578688 |
| FAM95B1 | 100133036 | GLI2      | FAM95B1\GLI2      | 0,247671272 | 0,006738973 |
| FAM95B1 | 100133036 | GRHL2     | FAM95B1\GRHL2     | 0,204684986 | 0,025550366 |
| FAM95B1 | 100133036 | GRIP1     | FAM95B1\GRIP1     | 0,338541518 | 0,000180689 |
| FAM95B1 | 100133036 | GRTP1     | FAM95B1\GRTP1     | 0,207384988 | 0,023790658 |
| FAM95B1 | 100133036 | HIST2H2BF | FAM95B1\HIST2H2BF | 0,415339695 | 3,2735E-06  |
| FAM95B1 | 100133036 | HPSE      | FAM95B1\HPSE      | 0,264705882 | 0,00372052  |
| FAM95B1 | 100133036 | KIAA1549  | FAM95B1\KIAA1549  | 0,25362484  | 0,005498616 |
| FAM95B1 | 100133036 | LARS      | FAM95B1\LARS      | 0,225160234 | 0,013972145 |
| FAM95B1 | 100133036 | LMBR1     | FAM95B1\LMBR1     | 0,189510041 | 0,039133442 |
| FAM95B1 | 100133036 | MAML3     | FAM95B1\MAML3     | 0,206943455 | 0,024095744 |
| FAM95B1 | 100133036 | MARVELD2  | FAM95B1\MARVELD2  | 0,219384703 | 0,016678909 |
| FAM95B1 | 100133036 | MTSS1L    | FAM95B1\MTSS1L    | 0,220865974 | 0,015944474 |

|          |           |          |                   |             |             |
|----------|-----------|----------|-------------------|-------------|-------------|
| FAM95B1  | 100133036 | NCS1     | FAM95B1\NCS1      | 0,315083321 | 0,000513031 |
| FAM95B1  | 100133036 | NDUFA4   | FAM95B1\NDUFA4    | 0,216336704 | 0,01828315  |
| FAM95B1  | 100133036 | NETO2    | FAM95B1\NETO2     | 0,251203532 | 0,005976079 |
| FAM95B1  | 100133036 | NRCAM    | FAM95B1\NRCAM     | 0,19828372  | 0,030794307 |
| FAM95B1  | 100133036 | OSBPL3   | FAM95B1\OSBPL3    | 0,295627404 | 0,00114874  |
| FAM95B1  | 100133036 | PKP1     | FAM95B1\PKP1      | 0,26741205  | 0,003373864 |
| FAM95B1  | 100133036 | PRSS8    | FAM95B1\PRSS8     | 0,40329013  | 6,54885E-06 |
| FAM95B1  | 100133036 | S100A14  | FAM95B1\S100A14   | 0,32576556  | 0,000322154 |
| FAM95B1  | 100133036 | SLC6A8   | FAM95B1\SLC6A8    | 0,478799316 | 5,42744E-08 |
| FAM95B1  | 100133036 | SORBS2   | FAM95B1\SORBS2    | 0,218181171 | 0,017297118 |
| FAM95B1  | 100133036 | SPIRE2   | FAM95B1\SPIRE2    | 0,558545791 | 0           |
| FAM95B1  | 100133036 | STARD7   | FAM95B1\STARD7    | 0,242479704 | 0,008017614 |
| FAM95B1  | 100133036 | STX6     | FAM95B1\STX6      | 0,443647629 | 5,79694E-07 |
| FAM95B1  | 100133036 | TMEM180  | FAM95B1\TMEM180   | 0,260888762 | 0,004263998 |
| FAM95B1  | 100133036 | TP63     | FAM95B1\TP63      | 0,187665575 | 0,041109257 |
| FAM95B1  | 100133036 | TRIM7    | FAM95B1\TRIM7     | 0,22423444  | 0,014378327 |
| FAM95B1  | 100133036 | VMA21    | FAM95B1\VMA21     | 0,191247686 | 0,037345711 |
| FAM95B1  | 100133036 | WDR91    | FAM95B1\WDR91     | 0,317048853 | 0,000471513 |
| FAM95B1  | 100133036 | XYLT2    | FAM95B1\XYLT2     | 0,343854152 | 0,000141064 |
| KCNQ1OT1 | 10984     | APP      | KCNQ1OT1\APP      | 0,546353796 | 8,11494E-11 |
| KCNQ1OT1 | 10984     | ATP6AP2  | KCNQ1OT1\ATP6AP2  | 0,393291554 | 1,14253E-05 |
| KCNQ1OT1 | 10984     | AUTS2    | KCNQ1OT1\AUTS2    | 0,607078764 | 0           |
| KCNQ1OT1 | 10984     | C14orf39 | KCNQ1OT1\C14orf39 | 0,622006563 | 4,34936E-14 |
| KCNQ1OT1 | 10984     | C15orf41 | KCNQ1OT1\C15orf41 | 0,451103831 | 3,58358E-07 |
| KCNQ1OT1 | 10984     | C5orf15  | KCNQ1OT1\C5orf15  | 0,524077767 | 1,46785E-09 |
| KCNQ1OT1 | 10984     | CBS      | KCNQ1OT1\CBS      | 0,215724256 | 0,01862116  |
| KCNQ1OT1 | 10984     | CCDC148  | KCNQ1OT1\CCDC148  | 0,579480451 | 5,02934E-12 |
| KCNQ1OT1 | 10984     | CDC42BPG | KCNQ1OT1\CDC42BPG | 0,548020225 | 5,20003E-11 |
| KCNQ1OT1 | 10984     | CLDN12   | KCNQ1OT1\CLDN12   | 0,648532973 | 0           |
| KCNQ1OT1 | 10984     | CLSTN1   | KCNQ1OT1\CLSTN1   | 0,454778522 | 2,81593E-07 |
| KCNQ1OT1 | 10984     | COG5     | KCNQ1OT1\COG5     | 0,50081185  | 1,0542E-08  |
| KCNQ1OT1 | 10984     | DET1     | KCNQ1OT1\DET1     | 0,223778664 | 0,014582053 |
| KCNQ1OT1 | 10984     | DHX32    | KCNQ1OT1\DHX32    | 0,473899729 | 7,67413E-08 |
| KCNQ1OT1 | 10984     | DMRTA1   | KCNQ1OT1\DMRTA1   | 0,321544805 | 0,000362754 |

|          |       |          |                   |             |             |
|----------|-------|----------|-------------------|-------------|-------------|
| KCNQ1OT1 | 10984 | DSG2     | KCNQ1OT1\DSG2     | 0,547892038 | 5,40679E-11 |
| KCNQ1OT1 | 10984 | DUOX1    | KCNQ1OT1\DUOX1    | 0,484852585 | 3,50841E-08 |
| KCNQ1OT1 | 10984 | EIF2AK4  | KCNQ1OT1\EIF2AK4  | 0,581370175 | 0           |
| KCNQ1OT1 | 10984 | EPS15L1  | KCNQ1OT1\EPS15L1  | 0,18139154  | 0,048466935 |
| KCNQ1OT1 | 10984 | ESRP1    | KCNQ1OT1\ESRP1    | 0,373864122 | 3,21305E-05 |
| KCNQ1OT1 | 10984 | FAM83B   | KCNQ1OT1\FAM83B   | 0,623244552 | 0           |
| KCNQ1OT1 | 10984 | GTF3C4   | KCNQ1OT1\GTF3C4   | 0,486476285 | 3,11571E-08 |
| KCNQ1OT1 | 10984 | HPS5     | KCNQ1OT1\HPS5     | 0,673928215 | 0           |
| KCNQ1OT1 | 10984 | KDM4D    | KCNQ1OT1\KDM4D    | 0,441639368 | 6,5866E-07  |
| KCNQ1OT1 | 10984 | KTN1     | KCNQ1OT1\KTN1     | 0,615994873 | 0           |
| KCNQ1OT1 | 10984 | LEPREL1  | KCNQ1OT1\LEPREL1  | 0,407883492 | 5,04256E-06 |
| KCNQ1OT1 | 10984 | LRIG3    | KCNQ1OT1\LRIG3    | 0,616493377 | 0           |
| KCNQ1OT1 | 10984 | MBLAC2   | KCNQ1OT1\MBLAC2   | 0,584282866 | 0           |
| KCNQ1OT1 | 10984 | MPP5     | KCNQ1OT1\MPP5     | 0,306509044 | 0,000736631 |
| KCNQ1OT1 | 10984 | N4BP1    | KCNQ1OT1\N4BP1    | 0,585101837 | 0           |
| KCNQ1OT1 | 10984 | NET1     | KCNQ1OT1\NET1     | 0,575267056 | 0           |
| KCNQ1OT1 | 10984 | NTF4     | KCNQ1OT1\NTF4     | 0,285764136 | 0,001694523 |
| KCNQ1OT1 | 10984 | NUDT12   | KCNQ1OT1\NUDT12   | 0,518138442 | 2,52204E-09 |
| KCNQ1OT1 | 10984 | NUDT9    | KCNQ1OT1\NUDT9    | 0,497443384 | 1,36857E-08 |
| KCNQ1OT1 | 10984 | PABPC4L  | KCNQ1OT1\PABPC4L  | 0,642301666 | 0           |
| KCNQ1OT1 | 10984 | PCSK6    | KCNQ1OT1\PCSK6    | 0,19809144  | 0,030959414 |
| KCNQ1OT1 | 10984 | PLD2     | KCNQ1OT1\PLD2     | 0,323415468 | 0,000357382 |
| KCNQ1OT1 | 10984 | PRKAR1A  | KCNQ1OT1\PRKAR1A  | 0,697941889 | 0           |
| KCNQ1OT1 | 10984 | PRRC1    | KCNQ1OT1\PRRC1    | 0,579112662 | 0           |
| KCNQ1OT1 | 10984 | RAB23    | KCNQ1OT1\RAB23    | 0,59789916  | 0           |
| KCNQ1OT1 | 10984 | RANBP17  | KCNQ1OT1\RANBP17  | 0,700384561 | 0           |
| KCNQ1OT1 | 10984 | RNF170   | KCNQ1OT1\RNF170   | 0,696140151 | 0           |
| KCNQ1OT1 | 10984 | RRM2B    | KCNQ1OT1\RRM2B    | 0,568758012 | 0           |
| KCNQ1OT1 | 10984 | SERPINB5 | KCNQ1OT1\SERPINB5 | 0,49322746  | 1,88626E-08 |
| KCNQ1OT1 | 10984 | SHROOM2  | KCNQ1OT1\SHROOM2  | 0,230301951 | 0,0118938   |
| KCNQ1OT1 | 10984 | SIX1     | KCNQ1OT1\SIX1     | 0,611956986 | 0           |
| KCNQ1OT1 | 10984 | SLC22A5  | KCNQ1OT1\SLC22A5  | 0,522532403 | 1,69599E-09 |
| KCNQ1OT1 | 10984 | SLC30A1  | KCNQ1OT1\SLC30A1  | 0,535051987 | 4,69034E-10 |
| KCNQ1OT1 | 10984 | SLC45A4  | KCNQ1OT1\SLC45A4  | 0,303567868 | 0,000831975 |

|          |       |          |                   |             |             |
|----------|-------|----------|-------------------|-------------|-------------|
| KCNQ1OT1 | 10984 | SPIN4    | KCNQ1OT1\SPIN4    | 0,462199117 | 1,71617E-07 |
| KCNQ1OT1 | 10984 | SPINT1   | KCNQ1OT1\SPINT1   | 0,370346105 | 3,84944E-05 |
| KCNQ1OT1 | 10984 | STK36    | KCNQ1OT1\STK36    | 0,710361772 | 0           |
| KCNQ1OT1 | 10984 | SUPT3H   | KCNQ1OT1\SUPT3H   | 0,398212505 | 8,70614E-06 |
| KCNQ1OT1 | 10984 | TM7SF3   | KCNQ1OT1\TM7SF3   | 0,293327161 | 0,001259237 |
| KCNQ1OT1 | 10984 | TMEM133  | KCNQ1OT1\TMEM133  | 0,363103547 | 5,54991E-05 |
| KCNQ1OT1 | 10984 | UBTD2    | KCNQ1OT1\UBTD2    | 0,471976926 | 8,77783E-08 |
| KCNQ1OT1 | 10984 | VPS35    | KCNQ1OT1\VPS35    | 0,461665005 | 1,77912E-07 |
| KCNQ1OT1 | 10984 | WASL     | KCNQ1OT1\WASL     | 0,744922376 | 0           |
| KCNQ1OT1 | 10984 | ZNF211   | KCNQ1OT1\ZNF211   | 0,514292836 | 3,51994E-09 |
| KCNQ1OT1 | 10984 | ZNF540   | KCNQ1OT1\ZNF540   | 0,562163509 | 0           |
| KCNQ1OT1 | 10984 | ALDH7A1  | KCNQ1OT1\ALDH7A1  | 0,432659165 | 1,15511E-06 |
| KCNQ1OT1 | 10984 | ALS2     | KCNQ1OT1\ALS2     | 0,645506338 | 0           |
| KCNQ1OT1 | 10984 | ANK3     | KCNQ1OT1\ANK3     | 0,688513032 | 0           |
| KCNQ1OT1 | 10984 | AP2B1    | KCNQ1OT1\AP2B1    | 0,302022504 | 0,000886492 |
| KCNQ1OT1 | 10984 | ATP6V0A1 | KCNQ1OT1\ATP6V0A1 | 0,213317191 | 0,020002589 |
| KCNQ1OT1 | 10984 | AZIN1    | KCNQ1OT1\AZIN1    | 0,399487253 | 8,10885E-06 |
| KCNQ1OT1 | 10984 | BAIAP2   | KCNQ1OT1\BAIAP2   | 0,271435693 | 0,002912101 |
| KCNQ1OT1 | 10984 | BRD1     | KCNQ1OT1\BRD1     | 0,385678678 | 1,72595E-05 |
| KCNQ1OT1 | 10984 | C19orf44 | KCNQ1OT1\C19orf44 | 0,180757727 | 0,049267614 |
| KCNQ1OT1 | 10984 | C1orf109 | KCNQ1OT1\C1orf109 | 0,534054978 | 5,26352E-10 |
| KCNQ1OT1 | 10984 | CCDC122  | KCNQ1OT1\CCDC122  | 0,587437687 | 0           |
| KCNQ1OT1 | 10984 | CCDC30   | KCNQ1OT1\CCDC30   | 0,678564307 | 0           |
| KCNQ1OT1 | 10984 | CCDC8    | KCNQ1OT1\CCDC8    | 0,412519584 | 3,85902E-06 |
| KCNQ1OT1 | 10984 | CDH1     | KCNQ1OT1\CDH1     | 0,562156388 | 0           |
| KCNQ1OT1 | 10984 | CDKL3    | KCNQ1OT1\CDKL3    | 0,252043868 | 0,005806337 |
| KCNQ1OT1 | 10984 | CDS1     | KCNQ1OT1\CDS1     | 0,393804301 | 1,11083E-05 |
| KCNQ1OT1 | 10984 | CHID1    | KCNQ1OT1\CHID1    | 0,187316622 | 0,04149232  |
| KCNQ1OT1 | 10984 | CNTNAP2  | KCNQ1OT1\CNTNAP2  | 0,288783649 | 0,001506509 |
| KCNQ1OT1 | 10984 | CNTNAP3  | KCNQ1OT1\CNTNAP3  | 0,472454066 | 8,49064E-08 |
| KCNQ1OT1 | 10984 | COL8A2   | KCNQ1OT1\COL8A2   | 0,20095428  | 0,028577442 |
| KCNQ1OT1 | 10984 | CRTC1    | KCNQ1OT1\CRTC1    | 0,449722262 | 3,92083E-07 |
| KCNQ1OT1 | 10984 | DCAKD    | KCNQ1OT1\DCAKD    | 0,419049993 | 2,63065E-06 |
| KCNQ1OT1 | 10984 | DDX31    | KCNQ1OT1\DDX31    | 0,355540521 | 8,06131E-05 |

|          |       |           |                    |             |             |
|----------|-------|-----------|--------------------|-------------|-------------|
| KCNQ1OT1 | 10984 | DENND1A   | KCNQ1OT1\DENND1A   | 0,240250677 | 0,00862962  |
| KCNQ1OT1 | 10984 | DNAJC16   | KCNQ1OT1\DNAJC16   | 0,610981342 | 0           |
| KCNQ1OT1 | 10984 | DNAJC21   | KCNQ1OT1\DNAJC21   | 0,277695485 | 0,002306353 |
| KCNQ1OT1 | 10984 | DUOXA1    | KCNQ1OT1\DUOXA1    | 0,559844749 | 3,60906E-11 |
| KCNQ1OT1 | 10984 | EDA2R     | KCNQ1OT1\EDA2R     | 0,450861701 | 3,64061E-07 |
| KCNQ1OT1 | 10984 | EFNB2     | KCNQ1OT1\EFNB2     | 0,520616721 | 2,02105E-09 |
| KCNQ1OT1 | 10984 | EXOC7     | KCNQ1OT1\EXOC7     | 0,370103974 | 3,89734E-05 |
| KCNQ1OT1 | 10984 | FAM154B   | KCNQ1OT1\FAM154B   | 0,401955565 | 5,86622E-06 |
| KCNQ1OT1 | 10984 | FAM160A1  | KCNQ1OT1\FAM160A1  | 0,698269477 | 0           |
| KCNQ1OT1 | 10984 | FBXL16    | KCNQ1OT1\FBXL16    | 0,230138157 | 0,01195557  |
| KCNQ1OT1 | 10984 | FEM1B     | KCNQ1OT1\FEM1B     | 0,573985187 | 0           |
| KCNQ1OT1 | 10984 | FNBP1L    | KCNQ1OT1\FNBP1L    | 0,712441248 | 0           |
| KCNQ1OT1 | 10984 | FOXE1     | KCNQ1OT1\FOXE1     | 0,220390403 | 0,016018607 |
| KCNQ1OT1 | 10984 | GLI2      | KCNQ1OT1\GLI2      | 0,380408774 | 2,28363E-05 |
| KCNQ1OT1 | 10984 | GNPDA1    | KCNQ1OT1\GNPDA1    | 0,529803447 | 8,34533E-10 |
| KCNQ1OT1 | 10984 | GOLM1     | KCNQ1OT1\GOLM1     | 0,372247543 | 3,4921E-05  |
| KCNQ1OT1 | 10984 | GPC4      | KCNQ1OT1\GPC4      | 0,433955277 | 1,06614E-06 |
| KCNQ1OT1 | 10984 | GPR107    | KCNQ1OT1\GPR107    | 0,610226463 | 0           |
| KCNQ1OT1 | 10984 | GRHL2     | KCNQ1OT1\GRHL2     | 0,371073888 | 3,25939E-05 |
| KCNQ1OT1 | 10984 | GRIP1     | KCNQ1OT1\GRIP1     | 0,535051987 | 4,69034E-10 |
| KCNQ1OT1 | 10984 | GRTP1     | KCNQ1OT1\GRTP1     | 0,353988036 | 8,69379E-05 |
| KCNQ1OT1 | 10984 | GTF2IRD2  | KCNQ1OT1\GTF2IRD2  | 0,356017661 | 7,87574E-05 |
| KCNQ1OT1 | 10984 | HDGFRP3   | KCNQ1OT1\HDGFRP3   | 0,292963965 | 0,001277546 |
| KCNQ1OT1 | 10984 | HIST2H2BF | KCNQ1OT1\HIST2H2BF | 0,381890044 | 2,11177E-05 |
| KCNQ1OT1 | 10984 | HN1L      | KCNQ1OT1\HN1L      | 0,223792907 | 0,014575649 |
| KCNQ1OT1 | 10984 | HPSE      | KCNQ1OT1\HPSE      | 0,440606751 | 7,03151E-07 |
| KCNQ1OT1 | 10984 | IFT140    | KCNQ1OT1\IFT140    | 0,45558325  | 2,67015E-07 |
| KCNQ1OT1 | 10984 | IGF1R     | KCNQ1OT1\IGF1R     | 0,609243697 | 0           |
| KCNQ1OT1 | 10984 | IGSF3     | KCNQ1OT1\IGSF3     | 0,446218487 | 4,91709E-07 |
| KCNQ1OT1 | 10984 | IKBIP     | KCNQ1OT1\IKBIP     | 0,211764706 | 0,020939811 |
| KCNQ1OT1 | 10984 | IQCE      | KCNQ1OT1\IQCE      | 0,514157527 | 3,56076E-09 |
| KCNQ1OT1 | 10984 | IQCH      | KCNQ1OT1\IQCH      | 0,288911836 | 0,001498965 |
| KCNQ1OT1 | 10984 | IRF2BP2   | KCNQ1OT1\IRF2BP2   | 0,67543085  | 0           |
| KCNQ1OT1 | 10984 | ITGA2     | KCNQ1OT1\ITGA2     | 0,617825096 | 0           |

|          |       |           |                    |             |             |
|----------|-------|-----------|--------------------|-------------|-------------|
| KCNQ1OT1 | 10984 | ITGAV     | KCNQ1OT1\ITGAV     | 0,551452785 | 6,01382E-12 |
| KCNQ1OT1 | 10984 | KAL1      | KCNQ1OT1\KAL1      | 0,579554195 | 0           |
| KCNQ1OT1 | 10984 | KCTD1     | KCNQ1OT1\KCTD1     | 0,432687651 | 1,15308E-06 |
| KCNQ1OT1 | 10984 | KDM4B     | KCNQ1OT1\KDM4B     | 0,220388833 | 0,016177912 |
| KCNQ1OT1 | 10984 | KIAA0319L | KCNQ1OT1\KIAA0319L | 0,619156815 | 0           |
| KCNQ1OT1 | 10984 | KLHDC10   | KCNQ1OT1\KLHDC10   | 0,596538955 | 0           |
| KCNQ1OT1 | 10984 | LAMP1     | KCNQ1OT1\LAMP1     | 0,267120068 | 0,003409812 |
| KCNQ1OT1 | 10984 | LARS      | KCNQ1OT1\LARS      | 0,372674833 | 3,41621E-05 |
| KCNQ1OT1 | 10984 | LPHN3     | KCNQ1OT1\LPHN3     | 0,413367518 | 2,97655E-06 |
| KCNQ1OT1 | 10984 | LPIN1     | KCNQ1OT1\LPIN1     | 0,523515169 | 1,54763E-09 |
| KCNQ1OT1 | 10984 | LRRK1     | KCNQ1OT1\LRRK1     | 0,639559892 | 0           |
| KCNQ1OT1 | 10984 | MAML3     | KCNQ1OT1\MAML3     | 0,592308788 | 0           |
| KCNQ1OT1 | 10984 | MARVELD2  | KCNQ1OT1\MARVELD2  | 0,516094573 | 3,01523E-09 |
| KCNQ1OT1 | 10984 | MAST4     | KCNQ1OT1\MAST4     | 0,64270047  | 0           |
| KCNQ1OT1 | 10984 | MCTP2     | KCNQ1OT1\MCTP2     | 0,575794046 | 0           |
| KCNQ1OT1 | 10984 | MTPAP     | KCNQ1OT1\MTPAP     | 0,247692636 | 0,00673411  |
| KCNQ1OT1 | 10984 | MYLK4     | KCNQ1OT1\MYLK4     | 0,506430708 | 6,74985E-09 |
| KCNQ1OT1 | 10984 | MYO10     | KCNQ1OT1\MYO10     | 0,565852443 | 0           |
| KCNQ1OT1 | 10984 | MYO5B     | KCNQ1OT1\MYO5B     | 0,527588663 | 1,04476E-09 |
| KCNQ1OT1 | 10984 | NAA25     | KCNQ1OT1\NAA25     | 0,523002421 | 1,62357E-09 |
| KCNQ1OT1 | 10984 | NDRG3     | KCNQ1OT1\NDRG3     | 0,276434981 | 0,002418248 |
| KCNQ1OT1 | 10984 | NEO1      | KCNQ1OT1\NEO1      | 0,593106395 | 0           |
| KCNQ1OT1 | 10984 | NHLRC3    | KCNQ1OT1\NHLRC3    | 0,713901154 | 0           |
| KCNQ1OT1 | 10984 | NPNT      | KCNQ1OT1\NPNT      | 0,585087594 | 0           |
| KCNQ1OT1 | 10984 | NRCAM     | KCNQ1OT1\NRCAM     | 0,346816693 | 0,000122649 |
| KCNQ1OT1 | 10984 | NXN       | KCNQ1OT1\NXN       | 0,301324598 | 0,000912171 |
| KCNQ1OT1 | 10984 | OSBPL3    | KCNQ1OT1\OSBPL3    | 0,600932916 | 0           |
| KCNQ1OT1 | 10984 | PARD6B    | KCNQ1OT1\PARD6B    | 0,587936191 | 0           |
| KCNQ1OT1 | 10984 | PAX1      | KCNQ1OT1\PAX1      | 0,388840621 | 1,45586E-05 |
| KCNQ1OT1 | 10984 | PAX9      | KCNQ1OT1\PAX9      | 0,581882923 | 0           |
| KCNQ1OT1 | 10984 | PDGFA     | KCNQ1OT1\PDGFA     | 0,373479561 | 3,27746E-05 |
| KCNQ1OT1 | 10984 | PDPK1     | KCNQ1OT1\PDPK1     | 0,595136021 | 0           |
| KCNQ1OT1 | 10984 | PGAP1     | KCNQ1OT1\PGAP1     | 0,75491383  | 0           |
| KCNQ1OT1 | 10984 | PIAS2     | KCNQ1OT1\PIAS2     | 0,254116223 | 0,005405987 |



|          |       |          |                   |             |             |
|----------|-------|----------|-------------------|-------------|-------------|
| KCNQ1OT1 | 10984 | PKP4     | KCNQ1OT1\PKP4     | 0,565133172 | 0           |
| KCNQ1OT1 | 10984 | PLA2G12A | KCNQ1OT1\PLA2G12A | 0,689716565 | 0           |
| KCNQ1OT1 | 10984 | POGZ     | KCNQ1OT1\POGZ     | 0,611373024 | 0           |
| KCNQ1OT1 | 10984 | POMT2    | KCNQ1OT1\POMT2    | 0,30524854  | 0,000776191 |
| KCNQ1OT1 | 10984 | POTEE    | KCNQ1OT1\POTEE    | 0,412032946 | 3,2265E-06  |
| KCNQ1OT1 | 10984 | PRKAA2   | KCNQ1OT1\PRKAA2   | 0,564111694 | 2,37776E-11 |
| KCNQ1OT1 | 10984 | PRRG4    | KCNQ1OT1\PRRG4    | 0,544238712 | 1,26002E-10 |
| KCNQ1OT1 | 10984 | PSD3     | KCNQ1OT1\PSD3     | 0,584204529 | 0           |
| KCNQ1OT1 | 10984 | RAB14    | KCNQ1OT1\RAB14    | 0,537850734 | 3,32693E-10 |
| KCNQ1OT1 | 10984 | RABGAP1  | KCNQ1OT1\RABGAP1  | 0,702763139 | 0           |
| KCNQ1OT1 | 10984 | RAI1     | KCNQ1OT1\RAI1     | 0,499430281 | 1,17392E-08 |
| KCNQ1OT1 | 10984 | RAVER2   | KCNQ1OT1\RAVER2   | 0,410653753 | 4,29959E-06 |
| KCNQ1OT1 | 10984 | RNF212   | KCNQ1OT1\RNF212   | 0,401374448 | 7,2953E-06  |
| KCNQ1OT1 | 10984 | RPGRIP1L | KCNQ1OT1\RPGRIP1L | 0,5293904   | 8,70843E-10 |
| KCNQ1OT1 | 10984 | RPS6KA6  | KCNQ1OT1\RPS6KA6  | 0,61322166  | 1,23049E-13 |
| KCNQ1OT1 | 10984 | SCAMP1   | KCNQ1OT1\SCAMP1   | 0,617070218 | 0           |
| KCNQ1OT1 | 10984 | SDR42E1  | KCNQ1OT1\SDR42E1  | 0,396389403 | 9,63304E-06 |
| KCNQ1OT1 | 10984 | SEC61A1  | KCNQ1OT1\SEC61A1  | 0,187131463 | 0,04169679  |
| KCNQ1OT1 | 10984 | SGPL1    | KCNQ1OT1\SGPL1    | 0,572033898 | 0           |
| KCNQ1OT1 | 10984 | SIX4     | KCNQ1OT1\SIX4     | 0,635329725 | 0           |
| KCNQ1OT1 | 10984 | SLC46A1  | KCNQ1OT1\SLC46A1  | 0,18821393  | 0,040513298 |
| KCNQ1OT1 | 10984 | SMO      | KCNQ1OT1\SMO      | 0,433620567 | 1,08847E-06 |
| KCNQ1OT1 | 10984 | SORBS2   | KCNQ1OT1\SORBS2   | 0,309094146 | 0,000661236 |
| KCNQ1OT1 | 10984 | SORCS2   | KCNQ1OT1\SORCS2   | 0,275452215 | 0,002508875 |
| KCNQ1OT1 | 10984 | SPATA6   | KCNQ1OT1\SPATA6   | 0,634332716 | 0           |
| KCNQ1OT1 | 10984 | SPIN1    | KCNQ1OT1\SPIN1    | 0,558068651 | 0           |
| KCNQ1OT1 | 10984 | ST7L     | KCNQ1OT1\ST7L     | 0,459037174 | 2,12228E-07 |
| KCNQ1OT1 | 10984 | STEAP2   | KCNQ1OT1\STEAP2   | 0,588463182 | 0           |
| KCNQ1OT1 | 10984 | STON2    | KCNQ1OT1\STON2    | 0,466721265 | 1,26192E-07 |
| KCNQ1OT1 | 10984 | SYT1     | KCNQ1OT1\SYT1     | 0,527602906 | 1,04328E-09 |
| KCNQ1OT1 | 10984 | TAB3     | KCNQ1OT1\TAB3     | 0,649843327 | 0           |
| KCNQ1OT1 | 10984 | TDGF1    | KCNQ1OT1\TDGF1    | 0,298259577 | 0,000985596 |
| KCNQ1OT1 | 10984 | TMEM180  | KCNQ1OT1\TMEM180  | 0,192850021 | 0,035758674 |
| KCNQ1OT1 | 10984 | TMEM185A | KCNQ1OT1\TMEM185A | 0,352442672 | 9,36922E-05 |

|           |        |          |                    |             |             |
|-----------|--------|----------|--------------------|-------------|-------------|
| KCNQ1OT1  | 10984  | TMEM30B  | KCNQ1OT1\TMEM30B   | 0,63186868  | 0           |
| KCNQ1OT1  | 10984  | TNPO1    | KCNQ1OT1\TNPO1     | 0,644694488 | 0           |
| KCNQ1OT1  | 10984  | TOMM20   | KCNQ1OT1\TOMM20    | 0,479945877 | 5,00059E-08 |
| KCNQ1OT1  | 10984  | TP63     | KCNQ1OT1\TP63      | 0,531427147 | 7,03464E-10 |
| KCNQ1OT1  | 10984  | TRMT5    | KCNQ1OT1\TRMT5     | 0,433691782 | 1,08368E-06 |
| KCNQ1OT1  | 10984  | TRPM7    | KCNQ1OT1\TRPM7     | 0,619249395 | 0           |
| KCNQ1OT1  | 10984  | TSPAN13  | KCNQ1OT1\TSPAN13   | 0,557676969 | 0           |
| KCNQ1OT1  | 10984  | TTC22    | KCNQ1OT1\TTC22     | 0,444004487 | 4,23818E-07 |
| KCNQ1OT1  | 10984  | TTC26    | KCNQ1OT1\TTC26     | 0,44713716  | 4,63476E-07 |
| KCNQ1OT1  | 10984  | UEVLD    | KCNQ1OT1\UEVLD     | 0,522760291 | 1,66053E-09 |
| KCNQ1OT1  | 10984  | UNC5B    | KCNQ1OT1\UNC5B     | 0,616044723 | 0           |
| KCNQ1OT1  | 10984  | UPF1     | KCNQ1OT1\UPF1      | 0,456466315 | 2,51848E-07 |
| KCNQ1OT1  | 10984  | USP28    | KCNQ1OT1\USP28     | 0,703389831 | 0           |
| KCNQ1OT1  | 10984  | USP46    | KCNQ1OT1\USP46     | 0,600633813 | 0           |
| KCNQ1OT1  | 10984  | WDR91    | KCNQ1OT1\WDR91     | 0,516585956 | 2,88938E-09 |
| KCNQ1OT1  | 10984  | XPO7     | KCNQ1OT1\XPO7      | 0,583741632 | 0           |
| KCNQ1OT1  | 10984  | XPR1     | KCNQ1OT1\XPR1      | 0,615004985 | 0           |
| KCNQ1OT1  | 10984  | ZBTB41   | KCNQ1OT1\ZBTB41    | 0,544573423 | 1,1826E-10  |
| KCNQ1OT1  | 10984  | ZNF221   | KCNQ1OT1\ZNF221    | 0,572966814 | 0           |
| KCNQ1OT1  | 10984  | ZNF229   | KCNQ1OT1\ZNF229    | 0,479561316 | 5,14007E-08 |
| KCNQ1OT1  | 10984  | ZNF257   | KCNQ1OT1\ZNF257    | 0,387046005 | 1,60382E-05 |
| KCNQ1OT1  | 10984  | ZNF280B  | KCNQ1OT1\ZNF280B   | 0,653389831 | 0           |
| KCNQ1OT1  | 10984  | ZNF449   | KCNQ1OT1\ZNF449    | 0,593063666 | 0           |
| KCNQ1OT1  | 10984  | ZNF543   | KCNQ1OT1\ZNF543    | 0,407904857 | 5,03639E-06 |
| KCNQ1OT1  | 10984  | ZNF562   | KCNQ1OT1\ZNF562    | 0,564584817 | 0           |
| KCNQ1OT1  | 10984  | ZNF572   | KCNQ1OT1\ZNF572    | 0,318038741 | 0,000451799 |
| LINC00174 | 285908 | ATP6AP2  | LINC00174\ATP6AP2  | 0,418565731 | 2,70717E-06 |
| LINC00174 | 285908 | C15orf41 | LINC00174\C15orf41 | 0,495933628 | 1,53628E-08 |
| LINC00174 | 285908 | C5orf15  | LINC00174\C5orf15  | 0,324070645 | 0,000347218 |
| LINC00174 | 285908 | CLDN12   | LINC00174\CLDN12   | 0,532630679 | 6,17361E-10 |
| LINC00174 | 285908 | COG5     | LINC00174\COG5     | 0,413181883 | 3,7132E-06  |
| LINC00174 | 285908 | CROT     | LINC00174\CROT     | 0,533236006 | 5,77307E-10 |
| LINC00174 | 285908 | DNAI1    | LINC00174\DNAI1    | 0,316912958 | 0,000445438 |
| LINC00174 | 285908 | DUOX1    | LINC00174\DUOX1    | 0,453916821 | 2,98042E-07 |

|           |        |         |                   |             |             |
|-----------|--------|---------|-------------------|-------------|-------------|
| LINC00174 | 285908 | EPS15L1 | LINC00174\EPS15L1 | 0,18778664  | 0,040977053 |
| LINC00174 | 285908 | ESRP1   | LINC00174\ESRP1   | 0,463616294 | 1,55926E-07 |
| LINC00174 | 285908 | FBXO2   | LINC00174\FBXO2   | 0,1889332   | 0,039742595 |
| LINC00174 | 285908 | FBXW11  | LINC00174\FBXW11  | 0,342209087 | 0,000152372 |
| LINC00174 | 285908 | GPHN    | LINC00174\GPHN    | 0,315304088 | 0,000508205 |
| LINC00174 | 285908 | GTF3C4  | LINC00174\GTF3C4  | 0,201467027 | 0,028167756 |
| LINC00174 | 285908 | KDM4D   | LINC00174\KDM4D   | 0,340371742 | 0,000165996 |
| LINC00174 | 285908 | LAMP2   | LINC00174\LAMP2   | 0,282609315 | 0,001913565 |
| LINC00174 | 285908 | LIMK1   | LINC00174\LIMK1   | 0,595221478 | 0           |
| LINC00174 | 285908 | LRIG3   | LINC00174\LRIG3   | 0,33473152  | 0,000215235 |
| LINC00174 | 285908 | MCOLN3  | LINC00174\MCOLN3  | 0,406815268 | 5,36032E-06 |
| LINC00174 | 285908 | MOV10   | LINC00174\MOV10   | 0,258574277 | 0,004627256 |
| LINC00174 | 285908 | MPP5    | LINC00174\MPP5    | 0,234795613 | 0,010304913 |
| LINC00174 | 285908 | N4BP1   | LINC00174\N4BP1   | 0,469491525 | 1,04297E-07 |
| LINC00174 | 285908 | NUDT12  | LINC00174\NUDT12  | 0,528571429 | 9,46664E-10 |
| LINC00174 | 285908 | PABPC4L | LINC00174\PABPC4L | 0,550056972 | 2,26637E-11 |
| LINC00174 | 285908 | PANK1   | LINC00174\PANK1   | 0,295556189 | 0,001152023 |
| LINC00174 | 285908 | PLD2    | LINC00174\PLD2    | 0,434852585 | 1,00841E-06 |
| LINC00174 | 285908 | RAB23   | LINC00174\RAB23   | 0,228806438 | 0,012468329 |
| LINC00174 | 285908 | RNF170  | LINC00174\RNF170  | 0,588278023 | 0           |
| LINC00174 | 285908 | SGPP2   | LINC00174\SGPP2   | 0,330658026 | 0,000258894 |
| LINC00174 | 285908 | SHROOM2 | LINC00174\SHROOM2 | 0,4190856   | 2,6251E-06  |
| LINC00174 | 285908 | SLC22A5 | LINC00174\SLC22A5 | 0,452229027 | 3,32953E-07 |
| LINC00174 | 285908 | SLC30A1 | LINC00174\SLC30A1 | 0,306217063 | 0,000745626 |
| LINC00174 | 285908 | SLC44A3 | LINC00174\SLC44A3 | 0,214079191 | 0,019555993 |
| LINC00174 | 285908 | SPINT1  | LINC00174\SPINT1  | 0,415304088 | 3,28033E-06 |
| LINC00174 | 285908 | SYBU    | LINC00174\SYBU    | 0,259606894 | 0,004461892 |
| LINC00174 | 285908 | TM7SF3  | LINC00174\TM7SF3  | 0,223451075 | 0,014730034 |
| LINC00174 | 285908 | TMEM129 | LINC00174\TMEM129 | 0,275153112 | 0,002537061 |
| LINC00174 | 285908 | UBAC1   | LINC00174\UBAC1   | 0,240471443 | 0,008567214 |
| LINC00174 | 285908 | WNK2    | LINC00174\WNK2    | 0,223600627 | 0,014662316 |
| LINC00174 | 285908 | ZNF132  | LINC00174\ZNF132  | 0,354757157 | 8,37487E-05 |
| LINC00174 | 285908 | AGPAT3  | LINC00174\AGPAT3  | 0,27175616  | 0,002877901 |
| LINC00174 | 285908 | ALDH7A1 | LINC00174\ALDH7A1 | 0,21526848  | 0,018876202 |

|           |        |          |                    |             |             |
|-----------|--------|----------|--------------------|-------------|-------------|
| LINC00174 | 285908 | ANK3     | LINC00174\ANK3     | 0,608438969 | 0           |
| LINC00174 | 285908 | ANKFY1   | LINC00174\ANKFY1   | 0,443576414 | 5,82333E-07 |
| LINC00174 | 285908 | AP2B1    | LINC00174\AP2B1    | 0,232709016 | 0,011017822 |
| LINC00174 | 285908 | ATHL1    | LINC00174\ATHL1    | 0,188021649 | 0,04072144  |
| LINC00174 | 285908 | ATP2C1   | LINC00174\ATP2C1   | 0,519918815 | 2,15235E-09 |
| LINC00174 | 285908 | ATP6V1C1 | LINC00174\ATP6V1C1 | 0,33315767  | 0,000231222 |
| LINC00174 | 285908 | ATRNL1   | LINC00174\ATRNL1   | 0,232773524 | 0,010848166 |
| LINC00174 | 285908 | BRD1     | LINC00174\BRD1     | 0,319790628 | 0,000418764 |
| LINC00174 | 285908 | C1orf109 | LINC00174\C1orf109 | 0,3610668   | 6,14221E-05 |
| LINC00174 | 285908 | CAMSAP1  | LINC00174\CAMSAP1  | 0,449992879 | 3,85247E-07 |
| LINC00174 | 285908 | CBLN3    | LINC00174\CBLN3    | 0,383641931 | 1,92423E-05 |
| LINC00174 | 285908 | CCDC30   | LINC00174\CCDC30   | 0,606387979 | 0           |
| LINC00174 | 285908 | CCDC8    | LINC00174\CCDC8    | 0,250220766 | 0,006180194 |
| LINC00174 | 285908 | CDH1     | LINC00174\CDH1     | 0,510226463 | 4,95145E-09 |
| LINC00174 | 285908 | CDS1     | LINC00174\CDS1     | 0,47600057  | 6,61965E-08 |
| LINC00174 | 285908 | CETN3    | LINC00174\CETN3    | 0,235863837 | 0,009955923 |
| LINC00174 | 285908 | CLINT1   | LINC00174\CLINT1   | 0,212590799 | 0,020436495 |
| LINC00174 | 285908 | CLTC     | LINC00174\CLTC     | 0,304379718 | 0,000804584 |
| LINC00174 | 285908 | CNTNAP3  | LINC00174\CNTNAP3  | 0,472247543 | 8,61383E-08 |
| LINC00174 | 285908 | DDX31    | LINC00174\DDX31    | 0,382053838 | 2,09353E-05 |
| LINC00174 | 285908 | DENND1A  | LINC00174\DENND1A  | 0,36097422  | 6,1705E-05  |
| LINC00174 | 285908 | DHTKD1   | LINC00174\DHTKD1   | 0,180650904 | 0,049403637 |
| LINC00174 | 285908 | DNAJC16  | LINC00174\DNAJC16  | 0,538221051 | 3,17083E-10 |
| LINC00174 | 285908 | DTNB     | LINC00174\DTNB     | 0,234888193 | 0,010274246 |
| LINC00174 | 285908 | DUOXA1   | LINC00174\DUOXA1   | 0,334769527 | 0,00019818  |
| LINC00174 | 285908 | ELOVL6   | LINC00174\ELOVL6   | 0,421692067 | 2,24804E-06 |
| LINC00174 | 285908 | EPN3     | LINC00174\EPN3     | 0,208225324 | 0,02321917  |
| LINC00174 | 285908 | EXOC7    | LINC00174\EXOC7    | 0,209770688 | 0,022198978 |
| LINC00174 | 285908 | FAM154B  | LINC00174\FAM154B  | 0,473273881 | 5,46082E-08 |
| LINC00174 | 285908 | FAM199X  | LINC00174\FAM199X  | 0,427560177 | 1,57853E-06 |
| LINC00174 | 285908 | FEM1B    | LINC00174\FEM1B    | 0,308688221 | 0,000672584 |
| LINC00174 | 285908 | FKTN     | LINC00174\FKTN     | 0,602136448 | 0           |
| LINC00174 | 285908 | FLVCR1   | LINC00174\FLVCR1   | 0,434126193 | 1,05491E-06 |
| LINC00174 | 285908 | FSTL4    | LINC00174\FSTL4    | 0,31798889  | 0,000452773 |

|           |        |           |                     |             |             |
|-----------|--------|-----------|---------------------|-------------|-------------|
| LINC00174 | 285908 | GGA2      | LINC00174\GGA2      | 0,490015667 | 2,39906E-08 |
| LINC00174 | 285908 | GLI2      | LINC00174\GLI2      | 0,362191995 | 5,80805E-05 |
| LINC00174 | 285908 | GPR107    | LINC00174\GPR107    | 0,372689076 | 3,4137E-05  |
| LINC00174 | 285908 | GRHL2     | LINC00174\GRHL2     | 0,398772134 | 7,05724E-06 |
| LINC00174 | 285908 | GRIP1     | LINC00174\GRIP1     | 0,489182453 | 2,55216E-08 |
| LINC00174 | 285908 | GRTP1     | LINC00174\GRTP1     | 0,4062954   | 5,52173E-06 |
| LINC00174 | 285908 | GTF2I     | LINC00174\GTF2I     | 0,263630537 | 0,003866943 |
| LINC00174 | 285908 | HIST2H2BF | LINC00174\HIST2H2BF | 0,432167782 | 1,19065E-06 |
| LINC00174 | 285908 | HOMER2    | LINC00174\HOMER2    | 0,272197693 | 0,002831375 |
| LINC00174 | 285908 | HPSE      | LINC00174\HPSE      | 0,355618858 | 8,03056E-05 |
| LINC00174 | 285908 | IQCH      | LINC00174\IQCH      | 0,275195841 | 0,002533017 |
| LINC00174 | 285908 | ITGA2     | LINC00174\ITGA2     | 0,408438969 | 4,88447E-06 |
| LINC00174 | 285908 | KDM4B     | LINC00174\KDM4B     | 0,208275174 | 0,023185642 |
| LINC00174 | 285908 | KIAA1549  | LINC00174\KIAA1549  | 0,220851731 | 0,0159514   |
| LINC00174 | 285908 | KLHDC10   | LINC00174\KLHDC10   | 0,346845179 | 0,000122483 |
| LINC00174 | 285908 | LARS      | LINC00174\LARS      | 0,312149266 | 0,000581314 |
| LINC00174 | 285908 | LMBR1     | LINC00174\LMBR1     | 0,37590799  | 2,8902E-05  |
| LINC00174 | 285908 | MAML3     | LINC00174\MAML3     | 0,538683948 | 2,98294E-10 |
| LINC00174 | 285908 | MAP3K2    | LINC00174\MAP3K2    | 0,346432132 | 0,000124906 |
| LINC00174 | 285908 | MARVELD2  | LINC00174\MARVELD2  | 0,527531691 | 1,0507E-09  |
| LINC00174 | 285908 | MAST4     | LINC00174\MAST4     | 0,496773964 | 1,44069E-08 |
| LINC00174 | 285908 | MCTP2     | LINC00174\MCTP2     | 0,429774961 | 1,3791E-06  |
| LINC00174 | 285908 | METTL8    | LINC00174\METTL8    | 0,560667996 | 0           |
| LINC00174 | 285908 | MTSS1L    | LINC00174\MTSS1L    | 0,248554337 | 0,006540538 |
| LINC00174 | 285908 | MYO10     | LINC00174\MYO10     | 0,42456915  | 1,89172E-06 |
| LINC00174 | 285908 | NCS1      | LINC00174\NCS1      | 0,290948583 | 0,001383636 |
| LINC00174 | 285908 | NETO2     | LINC00174\NETO2     | 0,300783364 | 0,000932553 |
| LINC00174 | 285908 | NRCAM     | LINC00174\NRCAM     | 0,355255662 | 8,17403E-05 |
| LINC00174 | 285908 | NXN       | LINC00174\NXN       | 0,280864549 | 0,002045471 |
| LINC00174 | 285908 | OSBPL3    | LINC00174\OSBPL3    | 0,543312918 | 1,48783E-10 |
| LINC00174 | 285908 | PAX1      | LINC00174\PAX1      | 0,274896738 | 0,002561448 |
| LINC00174 | 285908 | PAX9      | LINC00174\PAX9      | 0,482502493 | 4,16075E-08 |
| LINC00174 | 285908 | PCTP      | LINC00174\PCTP      | 0,357420595 | 7,35299E-05 |
| LINC00174 | 285908 | PDPK1     | LINC00174\PDPK1     | 0,374747187 | 3,06961E-05 |

|           |        |          |                    |             |             |
|-----------|--------|----------|--------------------|-------------|-------------|
| LINC00174 | 285908 | PGAP1    | LINC00174\PGAP1    | 0,519121208 | 2,31157E-09 |
| LINC00174 | 285908 | PKP4     | LINC00174\PKP4     | 0,471122347 | 9,31546E-08 |
| LINC00174 | 285908 | PLA2G12A | LINC00174\PLA2G12A | 0,555996297 | 0           |
| LINC00174 | 285908 | POLR1A   | LINC00174\POLR1A   | 0,199594075 | 0,029688944 |
| LINC00174 | 285908 | PRRG4    | LINC00174\PRRG4    | 0,308916109 | 0,000666191 |
| LINC00174 | 285908 | PRSS8    | LINC00174\PRSS8    | 0,306950577 | 0,000723218 |
| LINC00174 | 285908 | PSD3     | LINC00174\PSD3     | 0,506979063 | 6,45739E-09 |
| LINC00174 | 285908 | RAB14    | LINC00174\RAB14    | 0,38129896  | 2,17884E-05 |
| LINC00174 | 285908 | RAD50    | LINC00174\RAD50    | 0,387544509 | 1,56136E-05 |
| LINC00174 | 285908 | RPS6KA6  | LINC00174\RPS6KA6  | 0,455977667 | 1,87566E-07 |
| LINC00174 | 285908 | S100A14  | LINC00174\S100A14  | 0,189609742 | 0,039028956 |
| LINC00174 | 285908 | SCD5     | LINC00174\SCD5     | 0,319605469 | 0,000422147 |
| LINC00174 | 285908 | SGPL1    | LINC00174\SGPL1    | 0,497849309 | 1,3265E-08  |
| LINC00174 | 285908 | SLC46A1  | LINC00174\SLC46A1  | 0,193398376 | 0,035228803 |
| LINC00174 | 285908 | SLC6A8   | LINC00174\SLC6A8   | 0,381548213 | 2,15031E-05 |
| LINC00174 | 285908 | SMO      | LINC00174\SMO      | 0,241674975 | 0,008233975 |
| LINC00174 | 285908 | SNX1     | LINC00174\SNX1     | 0,273123487 | 0,002736021 |
| LINC00174 | 285908 | SORBS2   | LINC00174\SORBS2   | 0,37170631  | 3,59051E-05 |
| LINC00174 | 285908 | SORCS2   | LINC00174\SORCS2   | 0,283613445 | 0,001841204 |
| LINC00174 | 285908 | SPATA6   | LINC00174\SPATA6   | 0,518651189 | 2,4102E-09  |
| LINC00174 | 285908 | SPIRE2   | LINC00174\SPIRE2   | 0,362248967 | 5,7916E-05  |
| LINC00174 | 285908 | STEAP2   | LINC00174\STEAP2   | 0,484959407 | 3,48119E-08 |
| LINC00174 | 285908 | STX6     | LINC00174\STX6     | 0,322916963 | 0,000365298 |
| LINC00174 | 285908 | SUSD4    | LINC00174\SUSD4    | 0,280309073 | 0,002089166 |
| LINC00174 | 285908 | TMEM180  | LINC00174\TMEM180  | 0,388370602 | 1,49332E-05 |
| LINC00174 | 285908 | TP63     | LINC00174\TP63     | 0,52194844  | 1,78985E-09 |
| LINC00174 | 285908 | TRPM7    | LINC00174\TRPM7    | 0,453446802 | 3,07397E-07 |
| LINC00174 | 285908 | TTC22    | LINC00174\TTC22    | 0,347716631 | 0,000106743 |
| LINC00174 | 285908 | UBE3C    | LINC00174\UBE3C    | 0,425345392 | 1,8052E-06  |
| LINC00174 | 285908 | UBFD1    | LINC00174\UBFD1    | 0,333698903 | 0,000225604 |
| LINC00174 | 285908 | UNC5B    | LINC00174\UNC5B    | 0,384482267 | 1,83996E-05 |
| LINC00174 | 285908 | UPF1     | LINC00174\UPF1     | 0,259557043 | 0,004469752 |
| LINC00174 | 285908 | USP40    | LINC00174\USP40    | 0,617483264 | 0           |
| LINC00174 | 285908 | WDR91    | LINC00174\WDR91    | 0,566628685 | 0           |

|           |           |           |                     |             |             |
|-----------|-----------|-----------|---------------------|-------------|-------------|
| LINC00174 | 285908    | XYLT2     | LINC00174\XYLT2     | 0,361494089 | 6,01325E-05 |
| LINC00174 | 285908    | ZBTB41    | LINC00174\ZBTB41    | 0,363210369 | 5,52038E-05 |
| LINC00174 | 285908    | ZNF280B   | LINC00174\ZNF280B   | 0,431270474 | 1,25825E-06 |
| LINC00174 | 285908    | ZNF449    | LINC00174\ZNF449    | 0,531028344 | 7,34005E-10 |
| LINC00882 | 100302640 | AP1S1     | LINC00882\AP1S1     | 0,295710374 | 0,001094209 |
| LINC00882 | 100302640 | ATP6V0A1  | LINC00882\ATP6V0A1  | 0,37058233  | 3,34499E-05 |
| LINC00882 | 100302640 | BAIAP2    | LINC00882\BAIAP2    | 0,429467823 | 1,09446E-06 |
| LINC00882 | 100302640 | C14orf39  | LINC00882\C14orf39  | 0,226467788 | 0,013261736 |
| LINC00882 | 100302640 | CBLN3     | LINC00882\CBLN3     | 0,202852755 | 0,026927872 |
| LINC00882 | 100302640 | CDKL3     | LINC00882\CDKL3     | 0,431174804 | 9,81308E-07 |
| LINC00882 | 100302640 | COG5      | LINC00882\COG5      | 0,373875128 | 2,80953E-05 |
| LINC00882 | 100302640 | DHX32     | LINC00882\DHX32     | 0,200019666 | 0,029182242 |
| LINC00882 | 100302640 | DUOXA1    | LINC00882\DUOXA1    | 0,308398839 | 0,000644192 |
| LINC00882 | 100302640 | GLI2      | LINC00882\GLI2      | 0,461408678 | 1,2825E-07  |
| LINC00882 | 100302640 | GRHL2     | LINC00882\GRHL2     | 0,259857613 | 0,004317391 |
| LINC00882 | 100302640 | G RTP1    | LINC00882\G RTP1    | 0,339318567 | 0,000159948 |
| LINC00882 | 100302640 | HIST2H2BF | LINC00882\HIST2H2BF | 0,364923279 | 4,49464E-05 |
| LINC00882 | 100302640 | HOMER2    | LINC00882\HOMER2    | 0,330117263 | 0,00024591  |
| LINC00882 | 100302640 | KCTD1     | LINC00882\KCTD1     | 0,223389979 | 0,014601306 |
| LINC00882 | 100302640 | MAML3     | LINC00882\MAML3     | 0,460845623 | 1,33446E-07 |
| LINC00882 | 100302640 | MARVELD2  | LINC00882\MARVELD2  | 0,481867502 | 2,88264E-08 |
| LINC00882 | 100302640 | MRPL40    | LINC00882\MRPL40    | 0,226992814 | 0,013044269 |
| LINC00882 | 100302640 | NAGK      | LINC00882\NAGK      | 0,205650208 | 0,024849212 |
| LINC00882 | 100302640 | NET1      | LINC00882\NET1      | 0,327195083 | 0,000281117 |
| LINC00882 | 100302640 | NTF4      | LINC00882\NTF4      | 0,208077043 | 0,023158592 |
| LINC00882 | 100302640 | PLD2      | LINC00882\PLD2      | 0,444406578 | 4,1258E-07  |
| LINC00882 | 100302640 | PRSS8     | LINC00882\PRSS8     | 0,340907948 | 0,000148292 |
| LINC00882 | 100302640 | PSAT1     | LINC00882\PSAT1     | 0,327512246 | 0,000277082 |
| LINC00882 | 100302640 | RABGAP1   | LINC00882\RABGAP1   | 0,359135937 | 6,04569E-05 |
| LINC00882 | 100302640 | RNF170    | LINC00882\RNF170    | 0,424835099 | 1,46735E-06 |
| LINC00882 | 100302640 | SEC61A1   | LINC00882\SEC61A1   | 0,243955713 | 0,007502512 |
| LINC00882 | 100302640 | SIX1      | LINC00882\SIX1      | 0,415819104 | 2,56442E-06 |
| LINC00882 | 100302640 | SORCS1    | LINC00882\SORCS1    | 0,291724745 | 0,001286066 |
| LINC00882 | 100302640 | SPINT1    | LINC00882\SPINT1    | 0,326072538 | 0,00029584  |

|           |           |          |                    |             |             |
|-----------|-----------|----------|--------------------|-------------|-------------|
| LINC00882 | 100302640 | SYBU     | LINC00882\SYBU     | 0,352404232 | 8,47475E-05 |
| LINC00882 | 100302640 | ALDH7A1  | LINC00882\ALDH7A1  | 0,399779186 | 6,65778E-06 |
| LINC00882 | 100302640 | ANK3     | LINC00882\ANK3     | 0,369153313 | 3,60594E-05 |
| LINC00882 | 100302640 | AP2B1    | LINC00882\AP2B1    | 0,418937284 | 2,11801E-06 |
| LINC00882 | 100302640 | APP      | LINC00882\APP      | 0,239408516 | 0,008733269 |
| LINC00882 | 100302640 | ATP6AP2  | LINC00882\ATP6AP2  | 0,463033695 | 1,14314E-07 |
| LINC00882 | 100302640 | ATP6V1A  | LINC00882\ATP6V1A  | 0,280205001 | 0,00202536  |
| LINC00882 | 100302640 | ATP6V1C1 | LINC00882\ATP6V1C1 | 0,30305146  | 0,000807677 |
| LINC00882 | 100302640 | ATRNL1   | LINC00882\ATRNL1   | 0,399291679 | 6,84841E-06 |
| LINC00882 | 100302640 | AUTS2    | LINC00882\AUTS2    | 0,351816232 | 8,72536E-05 |
| LINC00882 | 100302640 | BBS4     | LINC00882\BBS4     | 0,204046572 | 0,026023346 |
| LINC00882 | 100302640 | BRD1     | LINC00882\BRD1     | 0,252369454 | 0,005623981 |
| LINC00882 | 100302640 | CAMSAP1  | LINC00882\CAMSAP1  | 0,389533738 | 1,1939E-05  |
| LINC00882 | 100302640 | CCDC122  | LINC00882\CCDC122  | 0,316062289 | 0,000462392 |
| LINC00882 | 100302640 | CCDC148  | LINC00882\CCDC148  | 0,388221229 | 1,28485E-05 |
| LINC00882 | 100302640 | CCDC30   | LINC00882\CCDC30   | 0,417964412 | 2,24871E-06 |
| LINC00882 | 100302640 | CCDC8    | LINC00882\CCDC8    | 0,362097317 | 5,19844E-05 |
| LINC00882 | 100302640 | CDC42BPG | LINC00882\CDC42BPG | 0,320010796 | 0,000388422 |
| LINC00882 | 100302640 | CDH1     | LINC00882\CDH1     | 0,533835981 | 4,05854E-10 |
| LINC00882 | 100302640 | CDKL5    | LINC00882\CDKL5    | 0,358016141 | 6,39844E-05 |
| LINC00882 | 100302640 | CDS1     | LINC00882\CDS1     | 0,498776947 | 7,78103E-09 |
| LINC00882 | 100302640 | CETN3    | LINC00882\CETN3    | 0,399601004 | 6,72687E-06 |
| LINC00882 | 100302640 | CLDN12   | LINC00882\CLDN12   | 0,463967367 | 1,06974E-07 |
| LINC00882 | 100302640 | CLSTN1   | LINC00882\CLSTN1   | 0,258509595 | 0,004530356 |
| LINC00882 | 100302640 | CLTC     | LINC00882\CLTC     | 0,215464457 | 0,018605491 |
| LINC00882 | 100302640 | CNTNAP3  | LINC00882\CNTNAP3  | 0,4539393   | 2,15966E-07 |
| LINC00882 | 100302640 | COX19    | LINC00882\COX19    | 0,200468684 | 0,028814601 |
| LINC00882 | 100302640 | CRTC1    | LINC00882\CRTC1    | 0,286238234 | 0,001600387 |
| LINC00882 | 100302640 | DCAKD    | LINC00882\DCAKD    | 0,338317185 | 0,000167722 |
| LINC00882 | 100302640 | DDX31    | LINC00882\DDX31    | 0,258156796 | 0,004587622 |
| LINC00882 | 100302640 | DENND1A  | LINC00882\DENND1A  | 0,288273069 | 0,001476468 |
| LINC00882 | 100302640 | DMRTA1   | LINC00882\DMRTA1   | 0,462089059 | 1,22228E-07 |
| LINC00882 | 100302640 | DNAL4    | LINC00882\DNAL4    | 0,284916126 | 0,00168589  |
| LINC00882 | 100302640 | DSG2     | LINC00882\DSG2     | 0,325203011 | 0,00030773  |



|           |           |           |                     |             |             |
|-----------|-----------|-----------|---------------------|-------------|-------------|
| LINC00882 | 100302640 | DUOX1     | LINC00882\DUOX1     | 0,320196105 | 0,000385235 |
| LINC00882 | 100302640 | EFNB2     | LINC00882\EFNB2     | 0,375329091 | 2,59967E-05 |
| LINC00882 | 100302640 | ENPEP     | LINC00882\ENPEP     | 0,358665537 | 6,1916E-05  |
| LINC00882 | 100302640 | EPN3      | LINC00882\EPN3      | 0,227791068 | 0,012719595 |
| LINC00882 | 100302640 | ESRP1     | LINC00882\ESRP1     | 0,349956015 | 9,56447E-05 |
| LINC00882 | 100302640 | EYA2      | LINC00882\EYA2      | 0,180989859 | 0,048858302 |
| LINC00882 | 100302640 | FAM154B   | LINC00882\FAM154B   | 0,309327571 | 0,000619109 |
| LINC00882 | 100302640 | FAM160A1  | LINC00882\FAM160A1  | 0,351969468 | 8,65939E-05 |
| LINC00882 | 100302640 | FAM199X   | LINC00882\FAM199X   | 0,391768136 | 1,05285E-05 |
| LINC00882 | 100302640 | FAM83B    | LINC00882\FAM83B    | 0,250470036 | 0,006006944 |
| LINC00882 | 100302640 | FKTN      | LINC00882\FKTN      | 0,396671697 | 7,96435E-06 |
| LINC00882 | 100302640 | FNBP1L    | LINC00882\FNBP1L    | 0,310766729 | 0,000582009 |
| LINC00882 | 100302640 | GNPDA1    | LINC00882\GNPDA1    | 0,46440213  | 1,03712E-07 |
| LINC00882 | 100302640 | GOLM1     | LINC00882\GOLM1     | 0,188020909 | 0,040587729 |
| LINC00882 | 100302640 | GPR107    | LINC00882\GPR107    | 0,224754851 | 0,013993389 |
| LINC00882 | 100302640 | GPR64     | LINC00882\GPR64     | 0,31870351  | 0,000411608 |
| LINC00882 | 100302640 | GRIP1     | LINC00882\GRIP1     | 0,340348457 | 0,000152302 |
| LINC00882 | 100302640 | HPS5      | LINC00882\HPS5      | 0,181788113 | 0,04785414  |
| LINC00882 | 100302640 | HPSE      | LINC00882\HPSE      | 0,415505504 | 2,61395E-06 |
| LINC00882 | 100302640 | IGSF3     | LINC00882\IGSF3     | 0,205204754 | 0,025170727 |
| LINC00882 | 100302640 | ITGA2     | LINC00882\ITGA2     | 0,385734903 | 1,47532E-05 |
| LINC00882 | 100302640 | KAL1      | LINC00882\KAL1      | 0,311340474 | 0,000567796 |
| LINC00882 | 100302640 | KDM4D     | LINC00882\KDM4D     | 0,30118768  | 0,000873053 |
| LINC00882 | 100302640 | KIAA0319L | LINC00882\KIAA0319L | 0,436121129 | 7,12847E-07 |
| LINC00882 | 100302640 | KIAA1549  | LINC00882\KIAA1549  | 0,347753689 | 0,00010655  |
| LINC00882 | 100302640 | KLHDC10   | LINC00882\KLHDC10   | 0,327832973 | 0,000273056 |
| LINC00882 | 100302640 | LAMP1     | LINC00882\LAMP1     | 0,414443541 | 2,78848E-06 |
| LINC00882 | 100302640 | LAMP2     | LINC00882\LAMP2     | 0,416955903 | 2,39224E-06 |
| LINC00882 | 100302640 | LEPREL1   | LINC00882\LEPREL1   | 0,204670208 | 0,02556123  |
| LINC00882 | 100302640 | LIMK1     | LINC00882\LIMK1     | 0,40811809  | 4,07938E-06 |
| LINC00882 | 100302640 | LMBR1     | LINC00882\LMBR1     | 0,410626889 | 3,51127E-06 |
| LINC00882 | 100302640 | LRIG3     | LINC00882\LRIG3     | 0,332084389 | 0,000224559 |
| LINC00882 | 100302640 | MAP3K2    | LINC00882\MAP3K2    | 0,274631477 | 0,002506178 |
| LINC00882 | 100302640 | MAPK1     | LINC00882\MAPK1     | 0,231625538 | 0,011256484 |

|           |           |          |                    |             |             |
|-----------|-----------|----------|--------------------|-------------|-------------|
| LINC00882 | 100302640 | MAST4    | LINC00882\MAST4    | 0,397623187 | 7,54059E-06 |
| LINC00882 | 100302640 | MCOLN3   | LINC00882\MCOLN3   | 0,532827473 | 4,43958E-10 |
| LINC00882 | 100302640 | MED22    | LINC00882\MED22    | 0,235859136 | 0,009814393 |
| LINC00882 | 100302640 | MPP5     | LINC00882\MPP5     | 0,33572286  | 0,000189527 |
| LINC00882 | 100302640 | MYLK4    | LINC00882\MYLK4    | 0,185483601 | 0,043425907 |
| LINC00882 | 100302640 | MYO10    | LINC00882\MYO10    | 0,533101872 | 4,33262E-10 |
| LINC00882 | 100302640 | N4BP1    | LINC00882\N4BP1    | 0,501079055 | 6,47429E-09 |
| LINC00882 | 100302640 | NCS1     | LINC00882\NCS1     | 0,333449261 | 0,000210769 |
| LINC00882 | 100302640 | NEO1     | LINC00882\NEO1     | 0,376291272 | 2,46899E-05 |
| LINC00882 | 100302640 | NETO2    | LINC00882\NETO2    | 0,332807807 | 0,000217149 |
| LINC00882 | 100302640 | NHLRC3   | LINC00882\NHLRC3   | 0,364880515 | 4,50459E-05 |
| LINC00882 | 100302640 | NISCH    | LINC00882\NISCH    | 0,289064196 | 0,001430693 |
| LINC00882 | 100302640 | NPNT     | LINC00882\NPNT     | 0,31981836  | 0,000391758 |
| LINC00882 | 100302640 | NRCAM    | LINC00882\NRCAM    | 0,343142346 | 0,000133236 |
| LINC00882 | 100302640 | NUDT12   | LINC00882\NUDT12   | 0,438533709 | 6,08823E-07 |
| LINC00882 | 100302640 | NUDT9    | LINC00882\NUDT9    | 0,307245858 | 0,000676628 |
| LINC00882 | 100302640 | NXN      | LINC00882\NXN      | 0,272037151 | 0,002763327 |
| LINC00882 | 100302640 | OAT      | LINC00882\OAT      | 0,21219304  | 0,020516365 |
| LINC00882 | 100302640 | OSBPL3   | LINC00882\OSBPL3   | 0,225624378 | 0,013617704 |
| LINC00882 | 100302640 | OXCT1    | LINC00882\OXCT1    | 0,20666228  | 0,024131756 |
| LINC00882 | 100302640 | PABPC4L  | LINC00882\PABPC4L  | 0,513876065 | 2,27196E-09 |
| LINC00882 | 100302640 | PANK1    | LINC00882\PANK1    | 0,418573793 | 2,16598E-06 |
| LINC00882 | 100302640 | PAX1     | LINC00882\PAX1     | 0,296644046 | 0,00105322  |
| LINC00882 | 100302640 | PAX9     | LINC00882\PAX9     | 0,563496109 | 2,52623E-11 |
| LINC00882 | 100302640 | PDGFA    | LINC00882\PDGFA    | 0,188783527 | 0,039765651 |
| LINC00882 | 100302640 | PGAP1    | LINC00882\PGAP1    | 0,324440393 | 0,000318521 |
| LINC00882 | 100302640 | PIAS2    | LINC00882\PIAS2    | 0,196669849 | 0,032052729 |
| LINC00882 | 100302640 | PKP1     | LINC00882\PKP1     | 0,270176934 | 0,002962105 |
| LINC00882 | 100302640 | PKP4     | LINC00882\PKP4     | 0,463439949 | 1,11063E-07 |
| LINC00882 | 100302640 | PLA2G12A | LINC00882\PLA2G12A | 0,440137345 | 5,47852E-07 |
| LINC00882 | 100302640 | POGZ     | LINC00882\POGZ     | 0,181973422 | 0,047623496 |
| LINC00882 | 100302640 | POMT2    | LINC00882\POMT2    | 0,346613326 | 0,000112641 |
| LINC00882 | 100302640 | PRKAA2   | LINC00882\PRKAA2   | 0,315936248 | 0,000464954 |
| LINC00882 | 100302640 | PRKAR1A  | LINC00882\PRKAR1A  | 0,335615951 | 0,000190479 |

|           |           |          |                    |             |             |
|-----------|-----------|----------|--------------------|-------------|-------------|
| LINC00882 | 100302640 | PRRC1    | LINC00882\PRRC1    | 0,205482717 | 0,024969687 |
| LINC00882 | 100302640 | PRRG4    | LINC00882\PRRG4    | 0,362510699 | 5,08942E-05 |
| LINC00882 | 100302640 | PSD3     | LINC00882\PSD3     | 0,229907867 | 0,011892582 |
| LINC00882 | 100302640 | RAB14    | LINC00882\RAB14    | 0,214862203 | 0,018945265 |
| LINC00882 | 100302640 | RAB23    | LINC00882\RAB23    | 0,257208869 | 0,004744705 |
| LINC00882 | 100302640 | RAD50    | LINC00882\RAD50    | 0,293105357 | 0,001216387 |
| LINC00882 | 100302640 | RANBP17  | LINC00882\RANBP17  | 0,320174723 | 0,000385602 |
| LINC00882 | 100302640 | RASEF    | LINC00882\RASEF    | 0,21591667  | 0,018353838 |
| LINC00882 | 100302640 | RHBDD2   | LINC00882\RHBDD2   | 0,225891651 | 0,013504008 |
| LINC00882 | 100302640 | RNF212   | LINC00882\RNF212   | 0,278387548 | 0,002172079 |
| LINC00882 | 100302640 | RRM2B    | LINC00882\RRM2B    | 0,238186189 | 0,009093096 |
| LINC00882 | 100302640 | S100A14  | LINC00882\S100A14  | 0,378226326 | 2,22462E-05 |
| LINC00882 | 100302640 | SCAMP1   | LINC00882\SCAMP1   | 0,232969028 | 0,010779939 |
| LINC00882 | 100302640 | SCD5     | LINC00882\SCD5     | 0,423459536 | 1,59949E-06 |
| LINC00882 | 100302640 | SDR42E1  | LINC00882\SDR42E1  | 0,248214256 | 0,006491755 |
| LINC00882 | 100302640 | SERPINB5 | LINC00882\SERPINB5 | 0,359282046 | 6,00103E-05 |
| LINC00882 | 100302640 | SGPL1    | LINC00882\SGPL1    | 0,424995462 | 1,45264E-06 |
| LINC00882 | 100302640 | SHROOM2  | LINC00882\SHROOM2  | 0,214537912 | 0,019130429 |
| LINC00882 | 100302640 | SIX4     | LINC00882\SIX4     | 0,265679628 | 0,0034969   |
| LINC00882 | 100302640 | SLC22A5  | LINC00882\SLC22A5  | 0,470328454 | 6,77048E-08 |
| LINC00882 | 100302640 | SLC44A3  | LINC00882\SLC44A3  | 0,418331466 | 2,19853E-06 |
| LINC00882 | 100302640 | SLC46A1  | LINC00882\SLC46A1  | 0,24084466  | 0,008326594 |
| LINC00882 | 100302640 | SORBS2   | LINC00882\SORBS2   | 0,476187069 | 4,40606E-08 |
| LINC00882 | 100302640 | SPATA6   | LINC00882\SPATA6   | 0,416652995 | 2,43702E-06 |
| LINC00882 | 100302640 | SPIN1    | LINC00882\SPIN1    | 0,231643356 | 0,011250044 |
| LINC00882 | 100302640 | SPIRE2   | LINC00882\SPIRE2   | 0,245748221 | 0,007061222 |
| LINC00882 | 100302640 | STEAP2   | LINC00882\STEAP2   | 0,486436081 | 2,03774E-08 |
| LINC00882 | 100302640 | STON2    | LINC00882\STON2    | 0,402868857 | 5,56129E-06 |
| LINC00882 | 100302640 | SUFU     | LINC00882\SUFU     | 0,279741729 | 0,002061881 |
| LINC00882 | 100302640 | TMEM185A | LINC00882\TMEM185A | 0,273398459 | 0,002625571 |
| LINC00882 | 100302640 | TMEM30B  | LINC00882\TMEM30B  | 0,334529042 | 0,000200419 |
| LINC00882 | 100302640 | TNPO1    | LINC00882\TNPO1    | 0,300432189 | 0,000900906 |
| LINC00882 | 100302640 | TOMM20   | LINC00882\TOMM20   | 0,269018753 | 0,003092281 |
| LINC00882 | 100302640 | TP63     | LINC00882\TP63     | 0,40933329  | 3,79413E-06 |

|           |           |           |                    |             |             |
|-----------|-----------|-----------|--------------------|-------------|-------------|
| LINC00882 | 100302640 | TRPM7     | LINC00882\TRPM7    | 0,237523353 | 0,009293633 |
| LINC00882 | 100302640 | TTC22     | LINC00882\TTC22    | 0,28579074  | 0,001628876 |
| LINC00882 | 100302640 | UBTD2     | LINC00882\UBTD2    | 0,285318816 | 0,001659418 |
| LINC00882 | 100302640 | UNC5B     | LINC00882\UNC5B    | 0,422379755 | 1,71104E-06 |
| LINC00882 | 100302640 | UPF1      | LINC00882\UPF1     | 0,299156408 | 0,000949792 |
| LINC00882 | 100302640 | USP28     | LINC00882\USP28    | 0,362567717 | 5,07455E-05 |
| LINC00882 | 100302640 | USP46     | LINC00882\USP46    | 0,261442466 | 0,0040785   |
| LINC00882 | 100302640 | VMA21     | LINC00882\VMA21    | 0,331011735 | 0,000235979 |
| LINC00882 | 100302640 | WASL      | LINC00882\WASL     | 0,41466805  | 2,75069E-06 |
| LINC00882 | 100302640 | WDR91     | LINC00882\WDR91    | 0,308935021 | 0,0006296   |
| LINC00882 | 100302640 | XPR1      | LINC00882\XPR1     | 0,334382933 | 0,000201792 |
| LINC00882 | 100302640 | ZBTB41    | LINC00882\ZBTB41   | 0,278939911 | 0,002126502 |
| LINC00882 | 100302640 | ZNF280B   | LINC00882\ZNF280B  | 0,456205772 | 1,8462E-07  |
| LINC00882 | 100302640 | ZNF449    | LINC00882\ZNF449   | 0,449584539 | 2,90984E-07 |
| OIP5-AS1  | 729082    | FAM45A    | OIP5-AS1\FAM45A    | 0,272632104 | 0,002786264 |
| OIP5-AS1  | 729082    | LZIC      | OIP5-AS1\LZIC      | 0,55758439  | 0           |
| OIP5-AS1  | 729082    | NDUFB5    | OIP5-AS1\NDUFB5    | 0,222781655 | 0,015036509 |
| OIP5-AS1  | 729082    | NIF3L1    | OIP5-AS1\NIF3L1    | 0,376591654 | 2,7892E-05  |
| OIP5-AS1  | 729082    | RTF1      | OIP5-AS1\RTF1      | 0,289303518 | 0,001476128 |
| OIP5-AS1  | 729082    | URB2      | OIP5-AS1\URB2      | 0,208624128 | 0,02295211  |
| OIP5-AS1  | 729082    | WDR3      | OIP5-AS1\WDR3      | 0,187679818 | 0,041093685 |
| OIP5-AS1  | 729082    | ARL6IP1   | OIP5-AS1\ARL6IP1   | 0,283706025 | 0,00183466  |
| OIP5-AS1  | 729082    | ATPAF1    | OIP5-AS1\ATPAF1    | 0,328087167 | 0,000290536 |
| OIP5-AS1  | 729082    | CSRP2BP   | OIP5-AS1\CSRP2BP   | 0,274013673 | 0,002647082 |
| OIP5-AS1  | 729082    | EIF2AK1   | OIP5-AS1\EIF2AK1   | 0,273102122 | 0,002738188 |
| OIP5-AS1  | 729082    | GGCT      | OIP5-AS1\GGCT      | 0,244979348 | 0,00737734  |
| OIP5-AS1  | 729082    | GINS3     | OIP5-AS1\GINS3     | 0,238342117 | 0,009186118 |
| OIP5-AS1  | 729082    | GTF2H4    | OIP5-AS1\GTF2H4    | 0,282217633 | 0,001942484 |
| OIP5-AS1  | 729082    | HIST1H2BC | OIP5-AS1\HIST1H2BC | 0,249964393 | 0,006234454 |
| OIP5-AS1  | 729082    | LRPPRC    | OIP5-AS1\LRPPRC    | 0,284959407 | 0,001748113 |
| OIP5-AS1  | 729082    | PMPCB     | OIP5-AS1\PMPCB     | 0,264292836 | 0,003776161 |
| OIP5-AS1  | 729082    | PNPT1     | OIP5-AS1\PNPT1     | 0,19193847  | 0,036654388 |
| OIP5-AS1  | 729082    | PSMC2     | OIP5-AS1\PSMC2     | 0,26249822  | 0,004026705 |
| OIP5-AS1  | 729082    | PSMD12    | OIP5-AS1\PSMD12    | 0,420581114 | 2,40199E-06 |

|            |           |          |                     |             |             |
|------------|-----------|----------|---------------------|-------------|-------------|
| OIP5-AS1   | 729082    | SCCPDH   | OIP5-AS1\SCCPDH     | 0,266137302 | 0,003533357 |
| OIP5-AS1   | 729082    | TRIM14   | OIP5-AS1\TRIM14     | 0,196218487 | 0,03260741  |
| OIP5-AS1   | 729082    | VANGL1   | OIP5-AS1\VANGL1     | 0,307641362 | 0,000702684 |
| PARD6G-AS1 | 100130522 | ACAD10   | PARD6G-AS1\ACAD10   | 0,264321322 | 0,0037723   |
| PARD6G-AS1 | 100130522 | AFG3L2   | PARD6G-AS1\AFG3L2   | 0,408859137 | 4,76801E-06 |
| PARD6G-AS1 | 100130522 | ANKFY1   | PARD6G-AS1\ANKFY1   | 0,456865119 | 2,45271E-07 |
| PARD6G-AS1 | 100130522 | AP1S1    | PARD6G-AS1\AP1S1    | 0,288513032 | 0,001522548 |
| PARD6G-AS1 | 100130522 | APOBEC2  | PARD6G-AS1\APOBEC2  | 0,361489542 | 5,3627E-05  |
| PARD6G-AS1 | 100130522 | APTX     | PARD6G-AS1\APTX     | 0,338477425 | 0,000181225 |
| PARD6G-AS1 | 100130522 | ARV1     | PARD6G-AS1\ARV1     | 0,298597066 | 0,001019209 |
| PARD6G-AS1 | 100130522 | ATP2C1   | PARD6G-AS1\ATP2C1   | 0,319114086 | 0,000431247 |
| PARD6G-AS1 | 100130522 | ATP6V1C1 | PARD6G-AS1\ATP6V1C1 | 0,203190429 | 0,026827283 |
| PARD6G-AS1 | 100130522 | C15orf41 | PARD6G-AS1\C15orf41 | 0,246403646 | 0,007033187 |
| PARD6G-AS1 | 100130522 | CAMSAP1  | PARD6G-AS1\CAMSAP1  | 0,477061672 | 6,14097E-08 |
| PARD6G-AS1 | 100130522 | CBLN3    | PARD6G-AS1\CBLN3    | 0,474975075 | 7,11586E-08 |
| PARD6G-AS1 | 100130522 | CBS      | PARD6G-AS1\CBS      | 0,261835921 | 0,004122876 |
| PARD6G-AS1 | 100130522 | CETN3    | PARD6G-AS1\CETN3    | 0,315902293 | 0,000495338 |
| PARD6G-AS1 | 100130522 | CLDN12   | PARD6G-AS1\CLDN12   | 0,245876656 | 0,007158824 |
| PARD6G-AS1 | 100130522 | COG5     | PARD6G-AS1\COG5     | 0,303040877 | 0,00085021  |
| PARD6G-AS1 | 100130522 | COG8     | PARD6G-AS1\COG8     | 0,237416322 | 0,009467307 |
| PARD6G-AS1 | 100130522 | CROT     | PARD6G-AS1\CROT     | 0,274839766 | 0,002566896 |
| PARD6G-AS1 | 100130522 | CSRP2BP  | PARD6G-AS1\CSRP2BP  | 0,302357214 | 0,000874414 |
| PARD6G-AS1 | 100130522 | CUX1     | PARD6G-AS1\CUX1     | 0,378023074 | 2,58839E-05 |
| PARD6G-AS1 | 100130522 | DNAI1    | PARD6G-AS1\DNAI1    | 0,316457437 | 0,000454444 |
| PARD6G-AS1 | 100130522 | DNAJC16  | PARD6G-AS1\DNAJC16  | 0,239766415 | 0,008767921 |
| PARD6G-AS1 | 100130522 | DUOX1    | PARD6G-AS1\DUOX1    | 0,504571998 | 7,83483E-09 |
| PARD6G-AS1 | 100130522 | EIF2AK1  | PARD6G-AS1\EIF2AK1  | 0,209884632 | 0,022125308 |
| PARD6G-AS1 | 100130522 | ELOVL6   | PARD6G-AS1\ELOVL6   | 0,302200541 | 0,000880049 |
| PARD6G-AS1 | 100130522 | ENPEP    | PARD6G-AS1\ENPEP    | 0,308289417 | 0,000683908 |
| PARD6G-AS1 | 100130522 | FAM120A  | PARD6G-AS1\FAM120A  | 0,431498362 | 1,24074E-06 |
| PARD6G-AS1 | 100130522 | FAM163A  | PARD6G-AS1\FAM163A  | 0,453646204 | 3,03394E-07 |
| PARD6G-AS1 | 100130522 | FAM199X  | PARD6G-AS1\FAM199X  | 0,263260219 | 0,003918553 |
| PARD6G-AS1 | 100130522 | FBXO22   | PARD6G-AS1\FBXO22   | 0,261764706 | 0,004133339 |
| PARD6G-AS1 | 100130522 | FKTN     | PARD6G-AS1\FKTN     | 0,272097992 | 0,002841821 |

|            |           |           |                      |             |             |
|------------|-----------|-----------|----------------------|-------------|-------------|
| PARD6G-AS1 | 100130522 | FLVCR1    | PARD6G-AS1\FLVCR1    | 0,363915397 | 5,3291E-05  |
| PARD6G-AS1 | 100130522 | FSTL4     | PARD6G-AS1\FSTL4     | 0,425089019 | 1,83335E-06 |
| PARD6G-AS1 | 100130522 | GGA1      | PARD6G-AS1\GGA1      | 0,312348668 | 0,000576421 |
| PARD6G-AS1 | 100130522 | GGA2      | PARD6G-AS1\GGA2      | 0,505512035 | 7,2674E-09  |
| PARD6G-AS1 | 100130522 | GGCT      | PARD6G-AS1\GGCT      | 0,205668708 | 0,024995469 |
| PARD6G-AS1 | 100130522 | GINS3     | PARD6G-AS1\GINS3     | 0,214356929 | 0,019395373 |
| PARD6G-AS1 | 100130522 | GLI2      | PARD6G-AS1\GLI2      | 0,544616152 | 1,1729E-10  |
| PARD6G-AS1 | 100130522 | HDAC4     | PARD6G-AS1\HDAC4     | 0,299202393 | 0,000994506 |
| PARD6G-AS1 | 100130522 | HIST1H2BC | PARD6G-AS1\HIST1H2BC | 0,260319043 | 0,004350957 |
| PARD6G-AS1 | 100130522 | HIST2H2BF | PARD6G-AS1\HIST2H2BF | 0,410319043 | 4,38351E-06 |
| PARD6G-AS1 | 100130522 | HN1L      | PARD6G-AS1\HN1L      | 0,263651901 | 0,003863984 |
| PARD6G-AS1 | 100130522 | HOMER2    | PARD6G-AS1\HOMER2    | 0,374077767 | 3,17778E-05 |
| PARD6G-AS1 | 100130522 | KDM4D     | PARD6G-AS1\KDM4D     | 0,271485543 | 0,002906757 |
| PARD6G-AS1 | 100130522 | KIAA1549  | PARD6G-AS1\KIAA1549  | 0,477054551 | 6,14407E-08 |
| PARD6G-AS1 | 100130522 | LARS      | PARD6G-AS1\LARS      | 0,245584675 | 0,007229289 |
| PARD6G-AS1 | 100130522 | LIMK1     | PARD6G-AS1\LIMK1     | 0,317832218 | 0,000455848 |
| PARD6G-AS1 | 100130522 | MAML3     | PARD6G-AS1\MAML3     | 0,313381285 | 0,000551681 |
| PARD6G-AS1 | 100130522 | MAP3K2    | PARD6G-AS1\MAP3K2    | 0,228372027 | 0,012639713 |
| PARD6G-AS1 | 100130522 | MCOLN3    | PARD6G-AS1\MCOLN3    | 0,508702464 | 5,61257E-09 |
| PARD6G-AS1 | 100130522 | MPP5      | PARD6G-AS1\MPP5      | 0,407206951 | 5,24167E-06 |
| PARD6G-AS1 | 100130522 | MTSS1L    | PARD6G-AS1\MTSS1L    | 0,260254949 | 0,004360839 |
| PARD6G-AS1 | 100130522 | N4BP1     | PARD6G-AS1\N4BP1     | 0,266756872 | 0,003455009 |
| PARD6G-AS1 | 100130522 | NAGK      | PARD6G-AS1\NAGK      | 0,47290272  | 8,22878E-08 |
| PARD6G-AS1 | 100130522 | NDUFA4    | PARD6G-AS1\NDUFA4    | 0,204920951 | 0,025536526 |
| PARD6G-AS1 | 100130522 | NETO2     | PARD6G-AS1\NETO2     | 0,497016095 | 1,4142E-08  |
| PARD6G-AS1 | 100130522 | NPTX1     | PARD6G-AS1\NPTX1     | 0,246581684 | 0,006991187 |
| PARD6G-AS1 | 100130522 | NRCAM     | PARD6G-AS1\NRCAM     | 0,462961117 | 1,63002E-07 |
| PARD6G-AS1 | 100130522 | NUDT12    | PARD6G-AS1\NUDT12    | 0,27967526  | 0,002140058 |
| PARD6G-AS1 | 100130522 | NVL       | PARD6G-AS1\NVL       | 0,262697621 | 0,003998147 |
| PARD6G-AS1 | 100130522 | OSBPL3    | PARD6G-AS1\OSBPL3    | 0,327125766 | 0,000303263 |
| PARD6G-AS1 | 100130522 | OXCT1     | PARD6G-AS1\OXCT1     | 0,540820396 | 2,21214E-10 |
| PARD6G-AS1 | 100130522 | PASK      | PARD6G-AS1\PASK      | 0,45820396  | 2,24367E-07 |
| PARD6G-AS1 | 100130522 | PCBD2     | PARD6G-AS1\PCBD2     | 0,255590372 | 0,00513641  |
| PARD6G-AS1 | 100130522 | PFN4      | PARD6G-AS1\PFN4      | 0,478793047 | 3,63023E-08 |

|            |           |          |                     |             |             |
|------------|-----------|----------|---------------------|-------------|-------------|
| PARD6G-AS1 | 100130522 | PLA2G12A | PARD6G-AS1\PLA2G12A | 0,257662726 | 0,004777775 |
| PARD6G-AS1 | 100130522 | PLEK2    | PARD6G-AS1\PLEK2    | 0,565774106 | 0           |
| PARD6G-AS1 | 100130522 | PRSS8    | PARD6G-AS1\PRSS8    | 0,59432417  | 0           |
| PARD6G-AS1 | 100130522 | RFESD    | PARD6G-AS1\RFESD    | 0,307121493 | 0,000718087 |
| PARD6G-AS1 | 100130522 | RRAGB    | PARD6G-AS1\RRAGB    | 0,377360775 | 2,67955E-05 |
| PARD6G-AS1 | 100130522 | SCCPDH   | PARD6G-AS1\SCCPDH   | 0,209435978 | 0,022416605 |
| PARD6G-AS1 | 100130522 | SCD5     | PARD6G-AS1\SCD5     | 0,297735365 | 0,001055344 |
| PARD6G-AS1 | 100130522 | SLC44A3  | PARD6G-AS1\SLC44A3  | 0,509813417 | 5,12319E-09 |
| PARD6G-AS1 | 100130522 | SLC6A8   | PARD6G-AS1\SLC6A8   | 0,538947443 | 2,87948E-10 |
| PARD6G-AS1 | 100130522 | SNX1     | PARD6G-AS1\SNX1     | 0,347101552 | 0,000121002 |
| PARD6G-AS1 | 100130522 | SPIRE2   | PARD6G-AS1\SPIRE2   | 0,508453212 | 5,72811E-09 |
| PARD6G-AS1 | 100130522 | SPRY3    | PARD6G-AS1\SPRY3    | 0,225167355 | 0,013969059 |
| PARD6G-AS1 | 100130522 | STX6     | PARD6G-AS1\STX6     | 0,545691497 | 9,4187E-11  |
| PARD6G-AS1 | 100130522 | TRIM14   | PARD6G-AS1\TRIM14   | 0,207655605 | 0,023605315 |
| PARD6G-AS1 | 100130522 | TRIM61   | PARD6G-AS1\TRIM61   | 0,246255742 | 0,00694053  |
| PARD6G-AS1 | 100130522 | TRIM7    | PARD6G-AS1\TRIM7    | 0,423728814 | 1,98982E-06 |
| PARD6G-AS1 | 100130522 | TTC22    | PARD6G-AS1\TTC22    | 0,33891787  | 0,000163018 |
| PARD6G-AS1 | 100130522 | UBE3C    | PARD6G-AS1\UBE3C    | 0,228678251 | 0,012518689 |
| PARD6G-AS1 | 100130522 | UBFD1    | PARD6G-AS1\UBFD1    | 0,21574562  | 0,018609278 |
| PARD6G-AS1 | 100130522 | VAC14    | PARD6G-AS1\VAC14    | 0,475957841 | 6,63965E-08 |
| PARD6G-AS1 | 100130522 | VANGL1   | PARD6G-AS1\VANGL1   | 0,266201396 | 0,003525178 |
| PARD6G-AS1 | 100130522 | VMA21    | PARD6G-AS1\VMA21    | 0,310981342 | 0,000610752 |
| PARD6G-AS1 | 100130522 | WDR61    | PARD6G-AS1\WDR61    | 0,201666429 | 0,028009793 |
| PARD6G-AS1 | 100130522 | WNK2     | PARD6G-AS1\WNK2     | 0,494487965 | 1,71483E-08 |
| PARD6G-AS1 | 100130522 | WVOX     | PARD6G-AS1\WVOX     | 0,255490671 | 0,005154255 |
| PARD6G-AS1 | 100130522 | XYLT2    | PARD6G-AS1\XYLT2    | 0,434318473 | 1,04241E-06 |
| PARD6G-AS1 | 100130522 | ZNF132   | PARD6G-AS1\ZNF132   | 0,28778664  | 0,001566374 |
| PARD6G-AS1 | 100130522 | ZNF544   | PARD6G-AS1\ZNF544   | 0,391240564 | 1,27804E-05 |
| PVT1       | 5820      | ARV1     | PVT1\ARV1           | 0,294366899 | 0,001208141 |
| PVT1       | 5820      | ATP6V0D1 | PVT1\ATP6V0D1       | 0,232025353 | 0,011260657 |
| PVT1       | 5820      | CBS      | PVT1\CBS            | 0,208809286 | 0,022829018 |
| PVT1       | 5820      | CCL25    | PVT1\CCL25          | 0,392778806 | 1,17507E-05 |
| PVT1       | 5820      | ESRP1    | PVT1\ESRP1          | 0,215738499 | 0,018613238 |
| PVT1       | 5820      | EYA2     | PVT1\EYA2           | 0,268095713 | 0,003291027 |

|      |      |         |              |             |             |
|------|------|---------|--------------|-------------|-------------|
| PVT1 | 5820 | FBXO2   | PVT1\FBXO2   | 0,493284432 | 1,87818E-08 |
| PVT1 | 5820 | GPHN    | PVT1\GPHN    | 0,236917818 | 0,009621842 |
| PVT1 | 5820 | MFSD3   | PVT1\MFSD3   | 0,571855861 | 0           |
| PVT1 | 5820 | MRPL40  | PVT1\MRPL40  | 0,508289417 | 5,80521E-09 |
| PVT1 | 5820 | NAGK    | PVT1\NAGK    | 0,510596781 | 4,80198E-09 |
| PVT1 | 5820 | NVL     | PVT1\NVL     | 0,354443811 | 8,50346E-05 |
| PVT1 | 5820 | PFN4    | PVT1\PFN4    | 0,346888525 | 0,000111142 |
| PVT1 | 5820 | PLEK2   | PVT1\PLEK2   | 0,350470019 | 0,000103027 |
| PVT1 | 5820 | PSMC2   | PVT1\PSMC2   | 0,182281726 | 0,047360682 |
| PVT1 | 5820 | RASL10A | PVT1\RASL10A | 0,260689825 | 0,004190431 |
| PVT1 | 5820 | RFESD   | PVT1\RFESD   | 0,244345535 | 0,007535238 |
| PVT1 | 5820 | SCCPDH  | PVT1\SCCPDH  | 0,30710725  | 0,000718513 |
| PVT1 | 5820 | SHROOM2 | PVT1\SHROOM2 | 0,329995727 | 0,000266724 |
| PVT1 | 5820 | SNUPN   | PVT1\SNUPN   | 0,218216778 | 0,017278546 |
| PVT1 | 5820 | SPINT1  | PVT1\SPINT1  | 0,189096995 | 0,039568821 |
| PVT1 | 5820 | TMEM129 | PVT1\TMEM129 | 0,436390828 | 9,16309E-07 |
| PVT1 | 5820 | UBAC1   | PVT1\UBAC1   | 0,469049993 | 1,07526E-07 |
| PVT1 | 5820 | AGPAT3  | PVT1\AGPAT3  | 0,378307933 | 2,55009E-05 |
| PVT1 | 5820 | ATHL1   | PVT1\ATHL1   | 0,439061387 | 7,7512E-07  |
| PVT1 | 5820 | CALML3  | PVT1\CALML3  | 0,556893605 | 0           |
| PVT1 | 5820 | DENND1A | PVT1\DENND1A | 0,407427717 | 5,17589E-06 |
| PVT1 | 5820 | EIF3B   | PVT1\EIF3B   | 0,523515169 | 1,54763E-09 |
| PVT1 | 5820 | FAHD1   | PVT1\FAHD1   | 0,477453354 | 5,97274E-08 |
| PVT1 | 5820 | FBXL16  | PVT1\FBXL16  | 0,327510326 | 0,000298111 |
| PVT1 | 5820 | GGA2    | PVT1\GGA2    | 0,181006979 | 0,048951439 |
| PVT1 | 5820 | GGCT    | PVT1\GGCT    | 0,582972511 | 0           |
| PVT1 | 5820 | GPS1    | PVT1\GPS1    | 0,430237858 | 1,34056E-06 |
| PVT1 | 5820 | IFI44   | PVT1\IFI44   | 0,247721122 | 0,00672763  |
| PVT1 | 5820 | LMOD3   | PVT1\LMOD3   | 0,343681562 | 0,000129822 |
| PVT1 | 5820 | NCS1    | PVT1\NCS1    | 0,307527418 | 0,000706033 |
| PVT1 | 5820 | NDUFA4  | PVT1\NDUFA4  | 0,428023074 | 1,53471E-06 |
| PVT1 | 5820 | NETO2   | PVT1\NETO2   | 0,206850876 | 0,024160138 |
| PVT1 | 5820 | PCBD2   | PVT1\PCBD2   | 0,298739496 | 0,001013346 |
| PVT1 | 5820 | PCCB    | PVT1\PCCB    | 0,429475858 | 1,40456E-06 |



|           |        |         |                   |             |             |
|-----------|--------|---------|-------------------|-------------|-------------|
| PVT1      | 5820   | PKP1    | PVT1\PKP1         | 0,351182168 | 9,95612E-05 |
| PVT1      | 5820   | PRMT5   | PVT1\PRMT5        | 0,213659023 | 0,019801169 |
| PVT1      | 5820   | PRSS8   | PVT1\PRSS8        | 0,342992451 | 0,000146886 |
| PVT1      | 5820   | S100A14 | PVT1\S100A14      | 0,347521721 | 0,00011861  |
| PVT1      | 5820   | SEC61A1 | PVT1\SEC61A1      | 0,195000712 | 0,033718352 |
| PVT1      | 5820   | SLCO5A1 | PVT1\SLCO5A1      | 0,263075061 | 0,00394459  |
| PVT1      | 5820   | SUSD4   | PVT1\SUSD4        | 0,555604615 | 0           |
| PVT1      | 5820   | TMEM180 | PVT1\TMEM180      | 0,547585814 | 5,91211E-11 |
| PVT1      | 5820   | XYLT2   | PVT1\XYLT2        | 0,187950434 | 0,040798757 |
| PVT1      | 5820   | ZC3HC1  | PVT1\ZC3HC1       | 0,266358069 | 0,003505258 |
| TTC28-AS1 | 284900 | AP1S1   | TTC28-AS1\AP1S1   | 0,260347529 | 0,004346571 |
| TTC28-AS1 | 284900 | DNAL4   | TTC28-AS1\DNAL4   | 0,302556616 | 0,00086729  |
| TTC28-AS1 | 284900 | RPL37   | TTC28-AS1\RPL37   | 0,682238997 | 0           |
| TTC28-AS1 | 284900 | TOMM40  | TTC28-AS1\TOMM40  | 0,535265632 | 4,57391E-10 |
| TTC28-AS1 | 284900 | TXNL1   | TTC28-AS1\TXNL1   | 0,363822817 | 5,35386E-05 |
| TTC28-AS1 | 284900 | CCDC73  | TTC28-AS1\CCDC73  | 0,306694203 | 0,000730979 |
| TTC28-AS1 | 284900 | DNAJC19 | TTC28-AS1\DNAJC19 | 0,211515454 | 0,021093759 |
| TTC28-AS1 | 284900 | EXOSC10 | TTC28-AS1\EXOSC10 | 0,293206096 | 0,001265313 |
| TTC28-AS1 | 284900 | GGCT    | TTC28-AS1\GGCT    | 0,322432702 | 0,000373144 |
| TTC28-AS1 | 284900 | GPR35   | TTC28-AS1\GPR35   | 0,286675687 | 0,001635628 |
| TTC28-AS1 | 284900 | GTF2H4  | TTC28-AS1\GTF2H4  | 0,493255946 | 1,88222E-08 |
| TTC28-AS1 | 284900 | IDH3G   | TTC28-AS1\IDH3G   | 0,608880501 | 0           |
| TTC28-AS1 | 284900 | LRRC27  | TTC28-AS1\LRRC27  | 0,412754593 | 3,80666E-06 |
| TTC28-AS1 | 284900 | MED22   | TTC28-AS1\MED22   | 0,188363481 | 0,040352028 |
| TTC28-AS1 | 284900 | NDUFA4  | TTC28-AS1\NDUFA4  | 0,459535679 | 2,05267E-07 |
| TTC28-AS1 | 284900 | RAB40C  | TTC28-AS1\RAB40C  | 0,238513032 | 0,009135021 |
| TTC28-AS1 | 284900 | RHBDD2  | TTC28-AS1\RHBDD2  | 0,202421308 | 0,027418618 |
| TTC28-AS1 | 284900 | RP9     | TTC28-AS1\RP9     | 0,643547928 | 0           |
| TTC28-AS1 | 284900 | SARS2   | TTC28-AS1\SARS2   | 0,41173622  | 4,03851E-06 |
| TTC28-AS1 | 284900 | SLC15A1 | TTC28-AS1\SLC15A1 | 0,200931585 | 0,02843972  |
