# Supplementary material for: LINC00174 is a novel prognostic factor in thymic epithelial tumors involved in cell migration and lipid metabolism
Source: PubMed Central journal article supplement (PMC7648846; doi:10.1038/s41419-020-03171-9), 2020-11-07
Supplement: 41419_2020_3171_MOESM17_ESM.pdf [file 41419_2020_3171_MOESM17_ESM.pdf]

**List of 128 genes positively correlated to LINC00174 in IRE cohort and validated in TCGA cohort**

| <b>lncRNAs</b> | <b>lncRNAs ID</b> | <b>mRNAs</b> | <b>lncRNA\gene</b> | <b>R Spearman</b> | <b>pval</b> |
|----------------|-------------------|--------------|--------------------|-------------------|-------------|
| LINC00174      | 285908            | USP40        | LINC00174\USP40    | 0,617483264       | 0           |
| LINC00174      | 285908            | ANK3         | LINC00174\ANK3     | 0,608438969       | 0           |
| LINC00174      | 285908            | CCDC30       | LINC00174\CCDC30   | 0,606387979       | 0           |
| LINC00174      | 285908            | FKTN         | LINC00174\FKTN     | 0,602136448       | 0           |
| LINC00174      | 285908            | LIMK1        | LINC00174\LIMK1    | 0,595221478       | 0           |
| LINC00174      | 285908            | RNF170       | LINC00174\RNF170   | 0,588278023       | 0           |
| LINC00174      | 285908            | WDR91        | LINC00174\WDR91    | 0,566628685       | 0           |
| LINC00174      | 285908            | METTL8       | LINC00174\METTL8   | 0,560667996       | 0           |
| LINC00174      | 285908            | PLA2G12A     | LINC00174\PLA2G12A | 0,555996297       | 0           |
| LINC00174      | 285908            | PABPC4L      | LINC00174\PABPC4L  | 0,550056972       | 2,26637E-11 |
| LINC00174      | 285908            | OSBPL3       | LINC00174\OSBPL3   | 0,543312918       | 1,48783E-10 |
| LINC00174      | 285908            | MAML3        | LINC00174\MAML3    | 0,538683948       | 2,98294E-10 |
| LINC00174      | 285908            | DNAJC16      | LINC00174\DNAJC16  | 0,538221051       | 3,17083E-10 |
| LINC00174      | 285908            | CROT         | LINC00174\CROT     | 0,533236006       | 5,77307E-10 |
| LINC00174      | 285908            | CLDN12       | LINC00174\CLDN12   | 0,532630679       | 6,17361E-10 |
| LINC00174      | 285908            | ZNF449       | LINC00174\ZNF449   | 0,531028344       | 7,34005E-10 |
| LINC00174      | 285908            | NUDT12       | LINC00174\NUDT12   | 0,528571429       | 9,46664E-10 |
| LINC00174      | 285908            | MARVELD2     | LINC00174\MARVELD2 | 0,527531691       | 1,0507E-09  |
| LINC00174      | 285908            | TP63         | LINC00174\TP63     | 0,52194844        | 1,78985E-09 |
| LINC00174      | 285908            | ATP2C1       | LINC00174\ATP2C1   | 0,519918815       | 2,15235E-09 |
| LINC00174      | 285908            | PGAP1        | LINC00174\PGAP1    | 0,519121208       | 2,31157E-09 |
| LINC00174      | 285908            | SPATA6       | LINC00174\SPATA6   | 0,518651189       | 2,4102E-09  |
| LINC00174      | 285908            | CDH1         | LINC00174\CDH1     | 0,510226463       | 4,95145E-09 |
| LINC00174      | 285908            | PSD3         | LINC00174\PSD3     | 0,506979063       | 6,45739E-09 |
| LINC00174      | 285908            | SGPL1        | LINC00174\SGPL1    | 0,497849309       | 1,3265E-08  |
| LINC00174      | 285908            | MAST4        | LINC00174\MAST4    | 0,496773964       | 1,44069E-08 |
| LINC00174      | 285908            | C15orf41     | LINC00174\C15orf41 | 0,495933628       | 1,53628E-08 |
| LINC00174      | 285908            | GGA2         | LINC00174\GGA2     | 0,490015667       | 2,39906E-08 |
| LINC00174      | 285908            | GRIP1        | LINC00174\GRIP1    | 0,489182453       | 2,55216E-08 |
| LINC00174      | 285908            | STEAP2       | LINC00174\STEAP2   | 0,484959407       | 3,48119E-08 |
| LINC00174      | 285908            | PAX9         | LINC00174\PAX9     | 0,482502493       | 4,16075E-08 |
| LINC00174      | 285908            | CDS1         | LINC00174\CDS1     | 0,47600057        | 6,61965E-08 |

|           |        |           |                     |             |             |
|-----------|--------|-----------|---------------------|-------------|-------------|
| LINC00174 | 285908 | FAM154B   | LINC00174\FAM154B   | 0,473273881 | 5,46082E-08 |
| LINC00174 | 285908 | CNTNAP3   | LINC00174\CNTNAP3   | 0,472247543 | 8,61383E-08 |
| LINC00174 | 285908 | PKP4      | LINC00174\PKP4      | 0,471122347 | 9,31546E-08 |
| LINC00174 | 285908 | N4BP1     | LINC00174\N4BP1     | 0,469491525 | 1,04297E-07 |
| LINC00174 | 285908 | ESRP1     | LINC00174\ESRP1     | 0,463616294 | 1,55926E-07 |
| LINC00174 | 285908 | RPS6KA6   | LINC00174\RPS6KA6   | 0,455977667 | 1,87566E-07 |
| LINC00174 | 285908 | DUOX1     | LINC00174\DUOX1     | 0,453916821 | 2,98042E-07 |
| LINC00174 | 285908 | TRPM7     | LINC00174\TRPM7     | 0,453446802 | 3,07397E-07 |
| LINC00174 | 285908 | SLC22A5   | LINC00174\SLC22A5   | 0,452229027 | 3,32953E-07 |
| LINC00174 | 285908 | CAMSAP1   | LINC00174\CAMSAP1   | 0,449992879 | 3,85247E-07 |
| LINC00174 | 285908 | ANKFY1    | LINC00174\ANKFY1    | 0,443576414 | 5,82333E-07 |
| LINC00174 | 285908 | PLD2      | LINC00174\PLD2      | 0,434852585 | 1,00841E-06 |
| LINC00174 | 285908 | FLVCR1    | LINC00174\FLVCR1    | 0,434126193 | 1,05491E-06 |
| LINC00174 | 285908 | HIST2H2BF | LINC00174\HIST2H2BF | 0,432167782 | 1,19065E-06 |
| LINC00174 | 285908 | ZNF280B   | LINC00174\ZNF280B   | 0,431270474 | 1,25825E-06 |
| LINC00174 | 285908 | MCTP2     | LINC00174\MCTP2     | 0,429774961 | 1,3791E-06  |
| LINC00174 | 285908 | FAM199X   | LINC00174\FAM199X   | 0,427560177 | 1,57853E-06 |
| LINC00174 | 285908 | UBE3C     | LINC00174\UBE3C     | 0,425345392 | 1,8052E-06  |
| LINC00174 | 285908 | MYO10     | LINC00174\MYO10     | 0,42456915  | 1,89172E-06 |
| LINC00174 | 285908 | ELOVL6    | LINC00174\ELOVL6    | 0,421692067 | 2,24804E-06 |
| LINC00174 | 285908 | SHROOM2   | LINC00174\SHROOM2   | 0,4190856   | 2,6251E-06  |
| LINC00174 | 285908 | ATP6AP2   | LINC00174\ATP6AP2   | 0,418565731 | 2,70717E-06 |
| LINC00174 | 285908 | SPINT1    | LINC00174\SPINT1    | 0,415304088 | 3,28033E-06 |
| LINC00174 | 285908 | COG5      | LINC00174\COG5      | 0,413181883 | 3,7132E-06  |
| LINC00174 | 285908 | ITGA2     | LINC00174\ITGA2     | 0,408438969 | 4,88447E-06 |
| LINC00174 | 285908 | MCOLN3    | LINC00174\MCOLN3    | 0,406815268 | 5,36032E-06 |
| LINC00174 | 285908 | GRTP1     | LINC00174\GRTP1     | 0,4062954   | 5,52173E-06 |
| LINC00174 | 285908 | GRHL2     | LINC00174\GRHL2     | 0,398772134 | 7,05724E-06 |
| LINC00174 | 285908 | TMEM180   | LINC00174\TMEM180   | 0,388370602 | 1,49332E-05 |
| LINC00174 | 285908 | RAD50     | LINC00174\RAD50     | 0,387544509 | 1,56136E-05 |
| LINC00174 | 285908 | UNC5B     | LINC00174\UNC5B     | 0,384482267 | 1,83996E-05 |
| LINC00174 | 285908 | CBLN3     | LINC00174\CBLN3     | 0,383641931 | 1,92423E-05 |
| LINC00174 | 285908 | DDX31     | LINC00174\DDX31     | 0,382053838 | 2,09353E-05 |
| LINC00174 | 285908 | SLC6A8    | LINC00174\SLC6A8    | 0,381548213 | 2,15031E-05 |

|           |        |          |                    |             |             |
|-----------|--------|----------|--------------------|-------------|-------------|
| LINC00174 | 285908 | RAB14    | LINC00174\RAB14    | 0,38129896  | 2,17884E-05 |
| LINC00174 | 285908 | LMBR1    | LINC00174\LMBR1    | 0,37590799  | 2,8902E-05  |
| LINC00174 | 285908 | PDPK1    | LINC00174\PDPK1    | 0,374747187 | 3,06961E-05 |
| LINC00174 | 285908 | GPR107   | LINC00174\GPR107   | 0,372689076 | 3,4137E-05  |
| LINC00174 | 285908 | SORBS2   | LINC00174\SORBS2   | 0,37170631  | 3,59051E-05 |
| LINC00174 | 285908 | ZBTB41   | LINC00174\ZBTB41   | 0,363210369 | 5,52038E-05 |
| LINC00174 | 285908 | SPIRE2   | LINC00174\SPIRE2   | 0,362248967 | 5,7916E-05  |
| LINC00174 | 285908 | GLI2     | LINC00174\GLI2     | 0,362191995 | 5,80805E-05 |
| LINC00174 | 285908 | XYLT2    | LINC00174\XYLT2    | 0,361494089 | 6,01325E-05 |
| LINC00174 | 285908 | C1orf109 | LINC00174\C1orf109 | 0,3610668   | 6,14221E-05 |
| LINC00174 | 285908 | DENND1A  | LINC00174\DENND1A  | 0,36097422  | 6,1705E-05  |
| LINC00174 | 285908 | PCTP     | LINC00174\PCTP     | 0,357420595 | 7,35299E-05 |
| LINC00174 | 285908 | HPSE     | LINC00174\HPSE     | 0,355618858 | 8,03056E-05 |
| LINC00174 | 285908 | NRCAM    | LINC00174\NRCAM    | 0,355255662 | 8,17403E-05 |
| LINC00174 | 285908 | ZNF132   | LINC00174\ZNF132   | 0,354757157 | 8,37487E-05 |
| LINC00174 | 285908 | TTC22    | LINC00174\TTC22    | 0,347716631 | 0,000106743 |
| LINC00174 | 285908 | KLHDC10  | LINC00174\KLHDC10  | 0,346845179 | 0,000122483 |
| LINC00174 | 285908 | MAP3K2   | LINC00174\MAP3K2   | 0,346432132 | 0,000124906 |
| LINC00174 | 285908 | FBXW11   | LINC00174\FBXW11   | 0,342209087 | 0,000152372 |
| LINC00174 | 285908 | KDM4D    | LINC00174\KDM4D    | 0,340371742 | 0,000165996 |
| LINC00174 | 285908 | DUOXA1   | LINC00174\DUOXA1   | 0,334769527 | 0,00019818  |
| LINC00174 | 285908 | LRIG3    | LINC00174\LRIG3    | 0,33473152  | 0,000215235 |
| LINC00174 | 285908 | UBFD1    | LINC00174\UBFD1    | 0,333698903 | 0,000225604 |
| LINC00174 | 285908 | ATP6V1C1 | LINC00174\ATP6V1C1 | 0,33315767  | 0,000231222 |
| LINC00174 | 285908 | SGPP2    | LINC00174\SGPP2    | 0,330658026 | 0,000258894 |
| LINC00174 | 285908 | C5orf15  | LINC00174\C5orf15  | 0,324070645 | 0,000347218 |
| LINC00174 | 285908 | STX6     | LINC00174\STX6     | 0,322916963 | 0,000365298 |
| LINC00174 | 285908 | BRD1     | LINC00174\BRD1     | 0,319790628 | 0,000418764 |
| LINC00174 | 285908 | SCD5     | LINC00174\SCD5     | 0,319605469 | 0,000422147 |
| LINC00174 | 285908 | FSTL4    | LINC00174\FSTL4    | 0,31798889  | 0,000452773 |
| LINC00174 | 285908 | DNAI1    | LINC00174\DNAI1    | 0,316912958 | 0,000445438 |
| LINC00174 | 285908 | GPHN     | LINC00174\GPHN     | 0,315304088 | 0,000508205 |
| LINC00174 | 285908 | LARS     | LINC00174\LARS     | 0,312149266 | 0,000581314 |
| LINC00174 | 285908 | PRRG4    | LINC00174\PRRG4    | 0,308916109 | 0,000666191 |

|           |        |          |                    |             |             |
|-----------|--------|----------|--------------------|-------------|-------------|
| LINC00174 | 285908 | FEM1B    | LINC00174\FEM1B    | 0,308688221 | 0,000672584 |
| LINC00174 | 285908 | PRSS8    | LINC00174\PRSS8    | 0,306950577 | 0,000723218 |
| LINC00174 | 285908 | SLC30A1  | LINC00174\SLC30A1  | 0,306217063 | 0,000745626 |
| LINC00174 | 285908 | CLTC     | LINC00174\CLTC     | 0,304379718 | 0,000804584 |
| LINC00174 | 285908 | NETO2    | LINC00174\NETO2    | 0,300783364 | 0,000932553 |
| LINC00174 | 285908 | PANK1    | LINC00174\PANK1    | 0,295556189 | 0,001152023 |
| LINC00174 | 285908 | NCS1     | LINC00174\NCS1     | 0,290948583 | 0,001383636 |
| LINC00174 | 285908 | SORCS2   | LINC00174\SORCS2   | 0,283613445 | 0,001841204 |
| LINC00174 | 285908 | LAMP2    | LINC00174\LAMP2    | 0,282609315 | 0,001913565 |
| LINC00174 | 285908 | NXN      | LINC00174\NXN      | 0,280864549 | 0,002045471 |
| LINC00174 | 285908 | SUSD4    | LINC00174\SUSD4    | 0,280309073 | 0,002089166 |
| LINC00174 | 285908 | IQCH     | LINC00174\IQCH     | 0,275195841 | 0,002533017 |
| LINC00174 | 285908 | TMEM129  | LINC00174\TMEM129  | 0,275153112 | 0,002537061 |
| LINC00174 | 285908 | PAX1     | LINC00174\PAX1     | 0,274896738 | 0,002561448 |
| LINC00174 | 285908 | SNX1     | LINC00174\SNX1     | 0,273123487 | 0,002736021 |
| LINC00174 | 285908 | HOMER2   | LINC00174\HOMER2   | 0,272197693 | 0,002831375 |
| LINC00174 | 285908 | AGPAT3   | LINC00174\AGPAT3   | 0,27175616  | 0,002877901 |
| LINC00174 | 285908 | GTF2I    | LINC00174\GTF2I    | 0,263630537 | 0,003866943 |
| LINC00174 | 285908 | SYBU     | LINC00174\SYBU     | 0,259606894 | 0,004461892 |
| LINC00174 | 285908 | UPF1     | LINC00174\UPF1     | 0,259557043 | 0,004469752 |
| LINC00174 | 285908 | MOV10    | LINC00174\MOV10    | 0,258574277 | 0,004627256 |
| LINC00174 | 285908 | CCDC8    | LINC00174\CCDC8    | 0,250220766 | 0,006180194 |
| LINC00174 | 285908 | MTSS1L   | LINC00174\MTSS1L   | 0,248554337 | 0,006540538 |
| LINC00174 | 285908 | SMO      | LINC00174\SMO      | 0,241674975 | 0,008233975 |
| LINC00174 | 285908 | UBAC1    | LINC00174\UBAC1    | 0,240471443 | 0,008567214 |
| LINC00174 | 285908 | CETN3    | LINC00174\CETN3    | 0,235863837 | 0,009955923 |
| LINC00174 | 285908 | DTNB     | LINC00174\DTNB     | 0,234888193 | 0,010274246 |
| LINC00174 | 285908 | MPP5     | LINC00174\MPP5     | 0,234795613 | 0,010304913 |
| LINC00174 | 285908 | ATRNL1   | LINC00174\ATRNL1   | 0,232773524 | 0,010848166 |
| LINC00174 | 285908 | AP2B1    | LINC00174\AP2B1    | 0,232709016 | 0,011017822 |
| LINC00174 | 285908 | RAB23    | LINC00174\RAB23    | 0,228806438 | 0,012468329 |
| LINC00174 | 285908 | WNK2     | LINC00174\WNK2     | 0,223600627 | 0,014662316 |
| LINC00174 | 285908 | TM7SF3   | LINC00174\TM7SF3   | 0,223451075 | 0,014730034 |
| LINC00174 | 285908 | KIAA1549 | LINC00174\KIAA1549 | 0,220851731 | 0,0159514   |

|           |        |         |                   |             |             |
|-----------|--------|---------|-------------------|-------------|-------------|
| LINC00174 | 285908 | ALDH7A1 | LINC00174\ALDH7A1 | 0,21526848  | 0,018876202 |
| LINC00174 | 285908 | SLC44A3 | LINC00174\SLC44A3 | 0,214079191 | 0,019555993 |
| LINC00174 | 285908 | CLINT1  | LINC00174\CLINT1  | 0,212590799 | 0,020436495 |
| LINC00174 | 285908 | EXOC7   | LINC00174\EXOC7   | 0,209770688 | 0,022198978 |
| LINC00174 | 285908 | KDM4B   | LINC00174\KDM4B   | 0,208275174 | 0,023185642 |
| LINC00174 | 285908 | EPN3    | LINC00174\EPN3    | 0,208225324 | 0,02321917  |
| LINC00174 | 285908 | GTF3C4  | LINC00174\GTF3C4  | 0,201467027 | 0,028167756 |
| LINC00174 | 285908 | POLR1A  | LINC00174\POLR1A  | 0,199594075 | 0,029688944 |
| LINC00174 | 285908 | SLC46A1 | LINC00174\SLC46A1 | 0,193398376 | 0,035228803 |
| LINC00174 | 285908 | S100A14 | LINC00174\S100A14 | 0,189609742 | 0,039028956 |
| LINC00174 | 285908 | FBXO2   | LINC00174\FBXO2   | 0,1889332   | 0,039742595 |
| LINC00174 | 285908 | ATHL1   | LINC00174\ATHL1   | 0,188021649 | 0,04072144  |
| LINC00174 | 285908 | EPS15L1 | LINC00174\EPS15L1 | 0,18778664  | 0,040977053 |
| LINC00174 | 285908 | DHTKD1  | LINC00174\DHTKD1  | 0,180650904 | 0,049403637 |
